# Supplementary material for: Insights from transcriptomic profiling identify the CYP6Z gene family as key drivers of pyrethroid resistance escalation in Anopheles gambiae from Cameroon
Source: Research Square preprint supplement (doi:10.21203/rs.3.rs-7592244/v1), 2025-09-23
Supplement: Supplementary file 1 [file 0099e2364823c92ce11bf571.docx]

# Supplementary files 1

**Insights from transcriptomic profiling identify the CYP6Z gene family as key drivers of pyrethroid resistance escalation in Anopheles gambiae from Cameroon**

**Arnaud Tepa 1,2,*, Mersimine Kouamo1, Jonas A. Kengne-Ouafo1, Magellan Tchouakui 1, Constant A. Pieme 2 and Charles S. Wondji 1,3,4***

Figure S1.1 : Mapping statistic


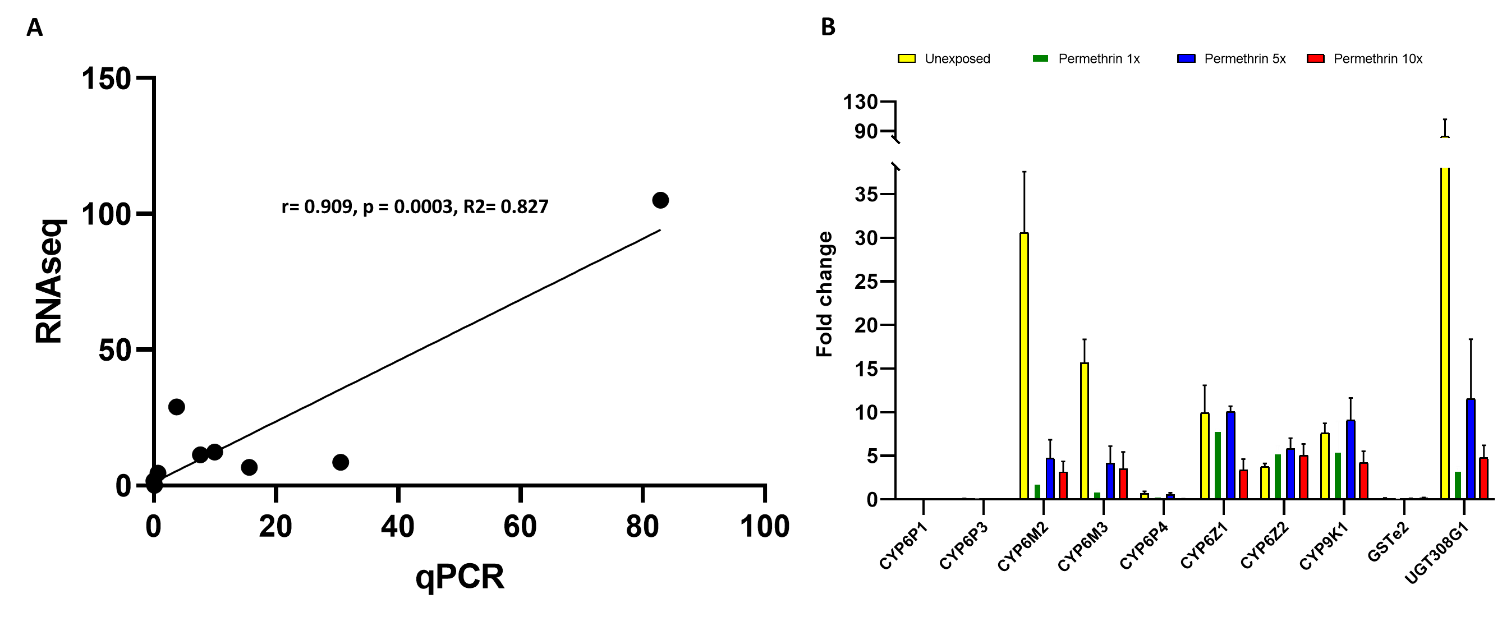


Figure S1.2 : A. Correlation curve between RNA-seq data and qRT-PCR: The dots represent fold changes in control versus susceptible groups, respectively, in RNA-seq and qRT-PCR. B. Expression profiles of key detoxification genes associated with permethrin resistance in *Anopheles gambiae* mosquitoes from mangoum, compared to the sensitive Kisumu strain. *The data are presented as fold changes relative to the kisumu population, with four different conditions: Unexposed (yellow), Permethrin 1x (green), Permethrin 5x (blue), and Permethrin 10x (red).*


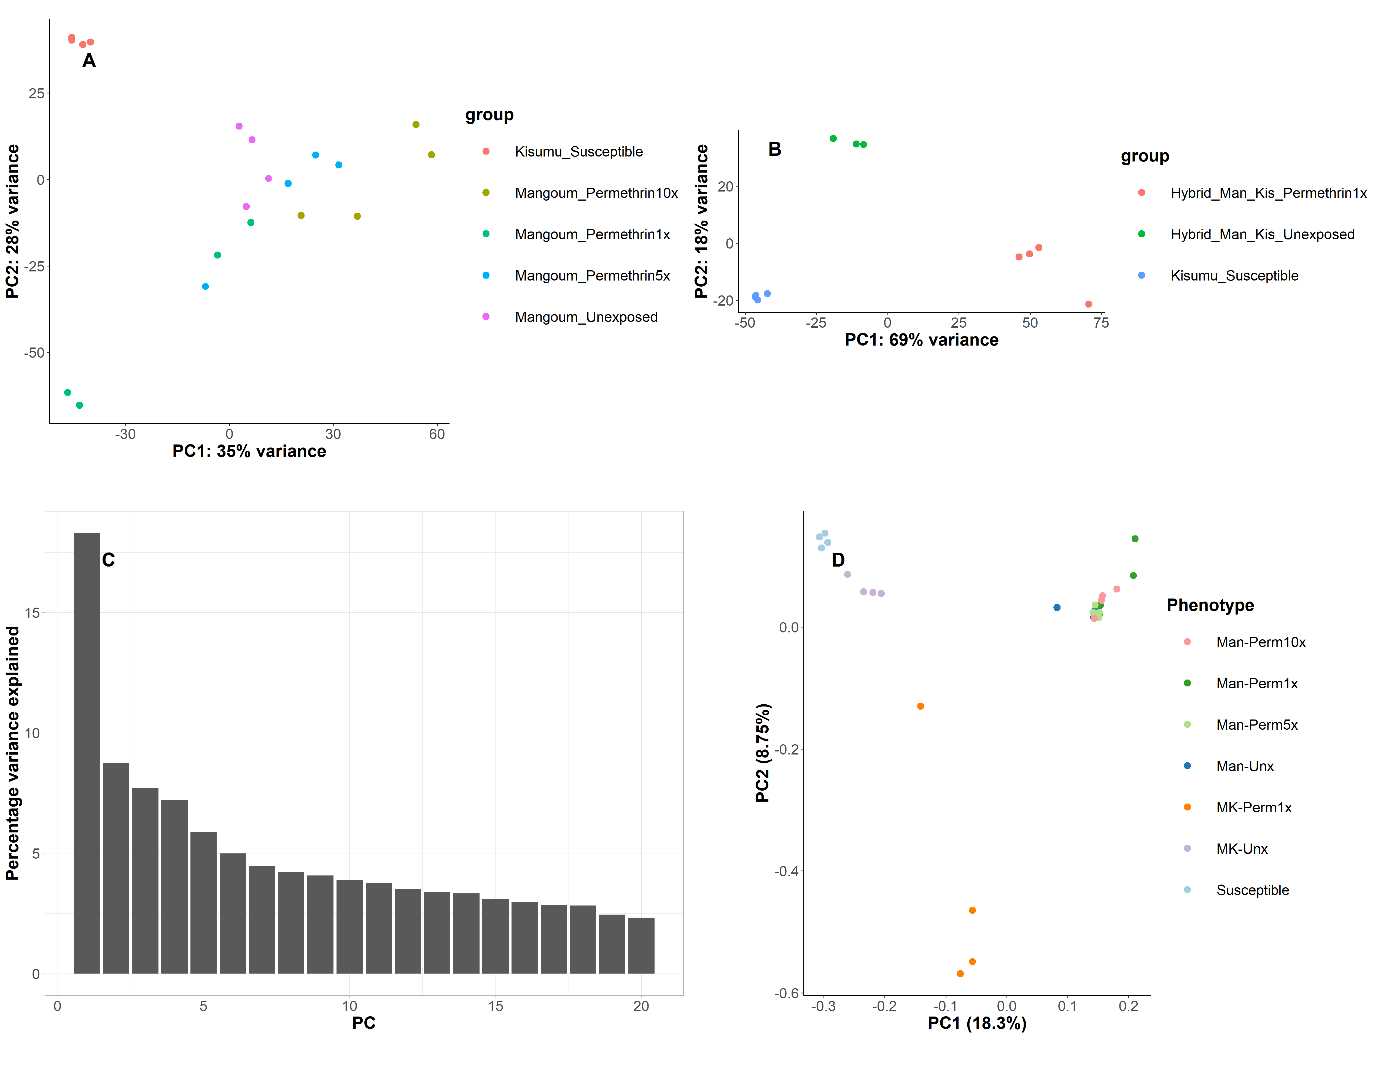


Figure S1.3: Exploratory clustering of samples. *A. Principal Component Analysis (PCA) of normalized read data from Mangoum F1 progeny. B. PCA of normalized read data from Mangoum X Kisumu F4 progeny. C. Histogram showing the percentage of overall variance related to the genetic polymorphism of Anopheles gambiae in field populations and hybrids compared to susceptible strains. D. PCA plot of principal components 1 and 2 illustrating the clustering of samples based on gene polymorphism.*


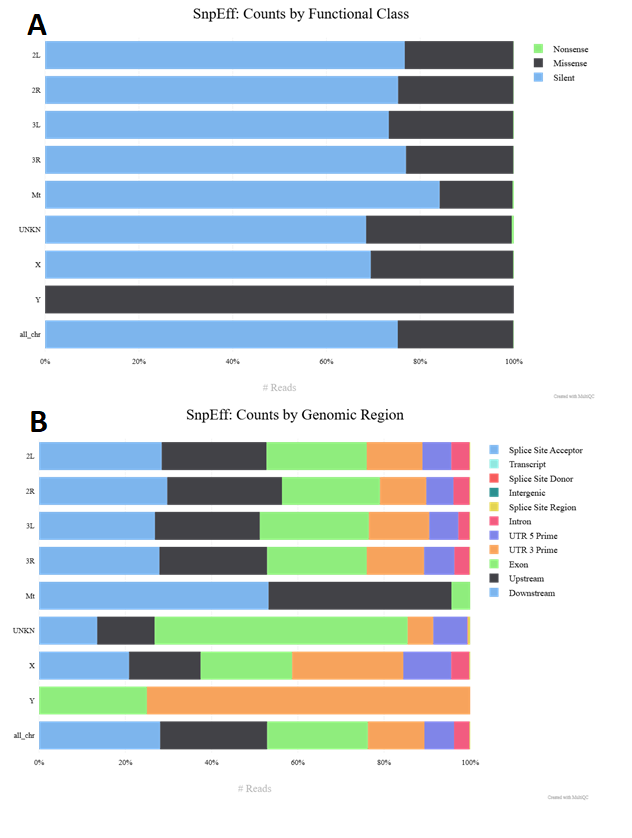


Figure S1.4 : Distribution of SnpEff-annotated Reads by Functional Class and Genomic Region. *Panel A illustrates the proportion of reads categorized by functional class—Nonsense, Missense, and Silent—across various genomic regions, indicating a predominance of Silent mutations. Panel B displays the distribution of reads across different genomic regions, highlighting the most common sites such as Exons, UTRs, and splice sites, with a notable enrichment of certain annotations like UTRs and splice sites in specific regions.*

Table S1.1 : Differential expression of candidate resistance genes in hybrid Mangoum x Kisumu F4 mosquitoes between different comparisons.

| **GeneID** | **Gene** | **Chr.** | **Fold change** | | | **Read Count** | | | **Annotation** | |
| --- | --- | --- | --- | --- | --- | --- | --- | --- | --- | --- |
| **RS** | **RC** | **CS** | **S** | **C** | **R** | |  |
| AGAP008210 | CYP6N1 | 3R | 5.7 |  | 3.1 | 33 | 125 | 213 | | Cytochrome P450 |
| AGAP013224 | CYP4H26 | 2R | 5.2 |  | 2.4 | 7 | 40 | 56 | | Cytochrome P450 |
| AGAP002207 | CYP325C1 | 2R | 5.0 | 3.5 |  | 19 | 25 | 108 | | Cytochrome P450 |
| AGAP008209 | CYP6M1 | 3R | 4.4 | 2.1 |  | 373 | 754 | 1747 | | Cytochrome P450 |
| AGAP009241 | AGAP009241 | 3R | 4.3 | 2.0 |  | 110 | 222 | 528 | | Cytochrome P450 |
| AGAP008218 | CYP6Z2 | 3R | 3.9 | 2.1 |  | 476 | 852 | 2006 | | Cytochrome P450 |
| AGAP001039 | CYP307A1 | X | 3.8 | 4.1 |  | 155 | 137 | 682 | | Cytochrome P450 |
| AGAP008219 | CYP6Z1 | 3R | 3.7 |  | 3.7 | 1520 | 6193 | 5962 | | Cytochrome P450 |
| AGAP000818 | CYP9K1 | X | 2.9 | 2.1 |  | 16198 | 21391 | 50505 | | Cytochrome P450 |
| AGAP012291 | CYP9J3 | 3L | 2.9 |  | 2.6 | 1490 | 4170 | 4447 | | Cytochrome P450 |
| AGAP000284 | CYP315A1 | X | 2.4 | 1.8 |  | 267 | 362 | 667 | | Cytochrome P450 |
| AGAP011029 | CYP6AF2 | 3L | 2.2 |  | 2.3 | 9 | 34 | 26 | | Cytochrome P450 |
| AGAP012292 | CYP9J4 | 3L | 2.1 |  | 2.2 | 2821 | 6511 | 6070 | | Cytochrome P450 |
| AGAP012957 | CYP4D17 | 2R | 2.1 | 1.9 |  | 1094 | 1194 | 2357 | | Cytochrome P450 |
| AGAP001789 | AGAP001789 | 2R | 7.6 | 4.0 |  | 27 | 49 | 217 | | Cytochrome P450 reductase |
| AGAP012732 | AGAP012732 | UNKN | 2.5 | 2.6 |  | 122 | 114 | 324 | | Cytochrome P450 reductase |
| AGAP005372 | COEBE3C | 2L | 11.4 | 8.0 |  | 736 | 1019 | 8924 | | carboxylesterase |
| AGAP013509 | AGAP013509 | 2R | 7.5 | 3.0 | 2.1 | 337 | 822 | 2683 | | carboxylesterase |
| AGAP011509 | COEunkn | 3L | 3.1 | 2.7 |  | 306 | 324 | 1029 | | carboxylesterase |
| AGAP010390 | COE12O | 3L | 2.8 | 3.4 |  | 307 | 249 | 901 | | carboxylesterase |
| AGAP006723 | COEAE2G | 2L | 2.7 | 2.2 |  | 734 | 855 | 2340 | | carboxylesterase |
| AGAP007990 | UGT308G1 | 3R | 13.0 |  | 20.6 | 710 | 16029 | 10039 | | glucosyltransferase |
| AGAP008404 | UGT301C1 | 3R | 7.2 | 13.9 |  | 764 | 396 | 5754 | | glucosyltransferase |
| AGAP007920 | UGT36C2 | 3R | 4.0 |  | 5.3 | 1467 | 8063 | 5960 | | glucosyltransferase |
| AGAP007374 | UGT49A3 | 2L | 3.1 |  | 2.0 | 1307 | 2778 | 4190 | | glucosyltransferase |
| AGAP005764 | AGAP005764 | 2L | 3.0 | 1.8 |  | 174 | 283 | 542 | | glucosyltransferase |
| AGAP005752 | UGT308A2 | 2L | 2.9 |  | 2.2 | 3662 | 8847 | 11177 | | glucosyltransferase |
| AGAP006222 | UGT302A1 | 2L | 2.9 | 1.6 |  | 725 | 1271 | 2216 | | glucosyltransferase |
| AGAP006383 | AGAP006383 | 2L | 2.4 | 1.9 |  | 2900 | 3693 | 7117 | | glucosyltransferase |
| AGAP008491 | AGAP008491 | 3R | 2.3 | 2.0 |  | 984 | 1132 | 2336 | | glucosyltransferase |
| AGAP004267 | AGAP004267 | 2R | 2.0 | 1.8 |  | 174 | 196 | 359 | | glucosyltransferase |
| AGAP004164 | GSTD1-4 | 2R | 3.4 | 2.3 |  | 9318 | 13508 | 32479 | | Glutathione S-transferase |
| AGAP000165 | GSTMS1 | X | 3.2 | 1.9 |  | 2748 | 4540 | 9193 | | Glutathione S-transferase |
| AGAP000888 | GSTT2 | X | 3.1 | 1.8 |  | 487 | 823 | 1568 | | Glutathione S-transferase |
| AGAP009342 | GSTU3 | 3R | 3.0 |  | 5.6 | 110 | 640 | 340 | | Glutathione S-transferase |
| AGAP005749 | GSTO1 | 2L | 2.7 | 2.1 |  | 2089 | 2611 | 5876 | | Glutathione S-transferase |
| AGAP009197 | GSTE3 | 3R | 2.4 | 2.5 |  | 1230 | 1148 | 3169 | | Glutathione S-transferase |
| AGAP004379 | GSTD6 | 2R | 2.2 | 2.0 |  | 84 | 88 | 203 | | Glutathione S-transferase |
| AGAP002898 | GSTZ1 | 2R | 2.1 | 2.0 |  | 2327 | 2437 | 5120 | | Glutathione S-transferase |
| AGAP009192 | GSTE5 | 3R | 2.0 | 2.2 |  | 1014 | 896 | 2164 | | Glutathione S-transferase |
| AGAP008052 | SAP2 | 3R | 26.1 | 3.6 | 3.9 | 28 | 164 | 853 | | Chemosensory protein |
| AGAP008055 | CSP3 | 3R | 9.9 |  | 13.6 | 33 | 490 | 352 | | Chemosensory protein |
| AGAP008051 | SAP1 | 3R | 4.0 |  | 2.6 | 1446 | 4123 | 6109 | | Chemosensory protein |
| AGAP008059 | CSP1 | 3R | 3.8 |  | 2.4 | 525 | 1358 | 2082 | | Chemosensory protein |
| AGAP028013 | CPLCP25 | 3L | 16.8 | 2.9 |  | 4 | 17 | 80 | | Cuticular |
| AGAP028044 | CPLCP23 | 3L | 7.5 | 2.8 |  | 2 | 3 | 25 | | Cuticular |
| AGAP008444 | CPLCG1 | 3R | 6.8 |  | 3.7 | 8822 | 40540 | 66696 | | Cuticular |
| AGAP004690 | CPF3 | 2L | 5.6 | 6.8 |  | 315 | 247 | 2197 | | Cuticular |
| AGAP010887 | CPR113 | 3L | 4.8 |  | 7.4 | 352 | 2682 | 1747 | | Cuticular |
| AGAP006009 | CPR30 | 2L | 4.1 | 5.1 |  | 141 | 111 | 628 | | Cuticular |
| AGAP009877 | CPR79 | 3R | 3.6 | 1.6 |  | 336 | 714 | 1269 | | Cuticular |
| AGAP009871 | CPR75 | 3R | 3.5 |  | 3.0 | 13583 | 51663 | 54352 | | Cuticular |
| AGAP010123 | CPR131 | 3R | 3.4 | 16.3 |  | 443 | 98 | 2064 | | Cuticular |
| AGAP028008 | CPLCP19 | 3L | 3.3 | 1.9 |  | 9 | 7 | 63 | | Cuticular |
| AGAP000877 | CYP4G17 | X | 3.2 |  | 4.1 | 3456 | 15587 | 11713 | | Cuticular |
| AGAP001076 | CYP4G16 | X | 3.0 | 2.0 |  | 14939 | 21473 | 50584 | | Cuticular |
| AGAP006369 | CPR144 | 2L | 2.6 |  | 2.4 | 126 | 392 | 387 | | Cuticular |
| AGAP011505 | AGAP011505 | 3L | 2.4 | 2.2 |  | 908 | 937 | 2425 | | Cuticular |
| AGAP009879 | CPR81 | 3R | 2.1 |  | 2.1 | 1638 | 3959 | 3738 | | Cuticular |
| AGAP006370 | AGAP006370 | 2L | 2.0 | 1.8 |  | 1653 | 1867 | 3546 | | Cuticular |
| AGAP004962 | AGAP004962 | 2L | 9.4 | 4.5 |  | 134 | 242 | 1587 | | cyclin B |
| AGAP004963 | AGAP004963 | 2L | 6.8 | 7.6 |  | 471 | 418 | 3621 | | cyclin B |
| AGAP002478 | AGAP002478 | 2R | 2.3 | 2.3 |  | 357 | 334 | 880 | | cyclin B |
