# Supplementary material for: Insights from transcriptomic profiling identify the CYP6Z gene family as key drivers of pyrethroid resistance escalation in Anopheles gambiae from Cameroon
Source: Research Square preprint supplement (doi:10.21203/rs.3.rs-7592244/v1), 2025-09-23
Supplement: Supplementary file 2 [file c6e90dc9054cd0a5c2d64718.xlsx]

## Sheet: Primer list
Table S2.1. List of Primers
Primer set	Primer sequence (5′–3′)	Product size	Purpose
EFq_F	GGCAAGAGGCATAACGATCAATGCG	110 bp	Real time PCR
EFq_R	GTCCATCTGCGACGCTCCGG
RPS7q_F	CCACCATCGAACACAAAGTTGA	117 bp	Real time PCR
RPS7q_R	TGCTGCAAACTTCGGCTATTC
6P3q_F	ACAATGTGATTGACGAAACCCT	101 bp	Real time PCR
6P3q_R	GGATCACATGCTTTGTGCCG
6P1q_F	ACAGGTGGTGAACGAAACCC	75 bp	Real time PCR
6P1q_R	GGTGTAATCCTGTCCCGCAA
9K1q_F	CCGACACGTGGTGATGGATAC	175 bp	Real time PCR
9K1q_R	CGTCGTCGGTCCAGTCAAC
6P4q_F	CTGGACAACGTTATCAATGAAACC	84 bp	Real time PCR
6P4q_R	GCACGGTGTAATCACGCATC
6Z1q_F	CCCGCAACTGTATCGGTCTG	138 bp	Real time PCR
6Z1q_R	TTCGGTGCCAGTGTGATTGA
6Z2q_F	AGGCCACGAAGAACTACGAT	154 bp	Real time PCR
6Z2q_R	ACTTTTGCAGGAGTTGTGGC
Gste2q_F	CCGGAATTTGTGAAGCTAAACC	147 bp	Real time PCR
Gste2q_R	GCTTGACGGGGTCTTTCGG
4G16q_F	GTCCAAGAAGTTGCGTCGGAC	186 bp	Real time PCR
4G16q_R	TCTTCGATTTGCGTTGACGTG
4G17q_F	TGTCACGACTACATGAGCGA	157 bp	Real time PCR
4G17q_R	CGCAGGTGGATCTTCAGTTG
SAP1_F	TTTGATCCGGAGAACAAGTAC	92 bp	Real time PCR
SAP1_R	CGTTCTTCCGGGTTTCCA
SAP2_F	CTACTTCAAGTGCCTGATGG	250 bp	Real time PCR
SAP2_R	CTTGATGCCCTCCTTCTTG
SAP3_F	GAGAAGCAGAAGAGTGGCAC	150 bp	Real time PCR
SAP3_F	ACAGGTTGATGCCCTTCTTC
qPCR_AGAP007990_2.F	GGAAGCGATCTGGCATGGTGT	147 bp	Real time PCR
qPCR_AGAP007990_2.R	CGCACTGCCTGCACTAACTCA
qPCR_CYP6M3_1.F	ATCTGCTCACTGGGTTCCGG	108 bp	Real time PCR
qPCR_CYP6M3_1.R	CCTTCAGCCATAATCCTCCCGC
qPCR_CYP6M2_2.F	AGCGTTTCAGTCCGGAGCAG	184 bp	Real time PCR
qPCR_CYP6M2_2.R	GAGAGTTCCATCGGGATGACGGT
full_AGAP007990EcoR1Bglll.F	GAATTCAGATCTATGGGTACGGCCACAGTGCTATCGCTG	1575 bp	Full length amplification
full_AGAP007990XbalKpnl.R	TCTAGAGGTACCTTACTCAACCTTCGATTTTGTGCTGCTGG
dsRNA_AGAP007990_1.F	taatacgactcactatagggagaAGTCGGACGAATCGAAGCTA	402 bp	Ds RNA synthesis
dsRNA_AGAP007990_1.R	taatacgactcactatagggagaGATTTCGGAGAACCCATTCA
Pro_AGAP007990_EcoR1Bglll.F	GAATTCAGATCTccagaggattgtagtcgacggatatg	1000 bp	1kb upstream region amplification
Pro_AGAP007990_XbalKpnl.R	TCTAGAGGTACCcgttcgttgagcttcttcgct

## Sheet: RSC
Table S2.2. Genes overexpressed in RSC comparison associated with pyrethroid resistance escalation in An. gambiae in Cameroon
GeneID	Gene Name	Chr.	R-S	R-C	C-S	Kis.Sus	Man.P1x	Man.Unx	Annotation
AGAP006380	ABCA2	2L	9.2004	1.51415	6.07628	5524.74	50819	33565.5	ABC Transporter
AGAP003568	COE22933	2R	2.95971	2.42574		560.592	1658.34	683.739	carboxylesterase
AGAP011916	COEB6582	3L	2.88969	2.17882		459.996	1328.87	610.018	carboxylesterase
AGAP006956	COE10O	2L	3.57719	3.0896		45.8981	164.694	53.0512	carboxylesterase
AGAP002090	COE16738	2R	2.36127	1.9904		1102.65	2602.56	1307.84	carboxylesterase
AGAP002863	COEAE6O	2R	2.02039	2.12628		350.613	708.302	332.992	carboxylesterase
AGAP006700	COEAE8O	2L	5.00941	2.59298		29.0525	146.782	56.5455	carboxylesterase
AGAP005835	COEJHE3E	2L	9.7058	37.2007		34.1748	334.697	9.05329	carboxylesterase
AGAP005836	COEJHE4E	2L	8.14984	20.8801		61.3671	500.922	23.8432	carboxylesterase
AGAP008052	SAP2	3R	11.9485	5.78918		27.7346	328.493	57.0812	Chemosensory protein
AGAP008054	SAP3	3R	2.77097	1.91679		1380.79	3825.22	1995.88	Chemosensory protein
AGAP001039	CYP307A1	X	2.66231	2.67066		152.857	407.184	152.332	Cytochrome P450
AGAP003065	CYP11179	2R	3.60691	2.3943		40.1469	144.261	60.5454	Cytochrome P450
AGAP002870	CYP6AD1	2R	3.55633	3.33766		76.7134	271.933	81.5642	Cytochrome P450
AGAP008356	CYP4H16	3R	6.50094	3.44453		15.6998	100.634	28.9572	Cytochrome P450
AGAP000088	CYP4H19	X	2.152	2.08418		717.16	1543.07	740.762	Cytochrome P450
AGAP004383	GSTD10	2R	7.37796	3.57324		23.3146	171.663	47.9512	Glutathione S-transferase
AGAP013465	CPLCP1	2R	4.4744	6.61455		60.3674	269.365	40.7091	Cuticular
AGAP008817	CPLCP3	3R	15.9181	15.476		8.7361	139.195	9.01634	Cuticular
AGAP003382	CPR120	2R	2.6273	2.20344		89.6444	235.874	106.719	Cuticular
AGAP003385	CPR123	2R	2.93696	3.15286		203.825	599.061	189.854	Cuticular
AGAP003379	AGAP003379	2R	2.28655	2.21906		107.342	245.742	110.579	Cuticular
AGAP008059	CSP1	3R	2.43264		2.70313	518.335	1260.23	1400.8	Chemosensory protein
AGAP008055	CSP3	3R	14.1166		10.2911	32.4775	462.22	336.938	Chemosensory protein
AGAP001789	AGAP001789	2R	3.18145		2.64791	26.4154	83.5031	69.3386	Cytochrome P450
AGAP008218	CYP6Z2	3R	17.2154		28.9935	470.481	8098.26	13639.9	Cytochrome P450
AGAP008209	CYP6M1	3R	3.94621		3.8119	368.452	1453.94	1404.42	Cytochrome P450
AGAP009375	CYP9M2	3R	3.2812		2.2367	50.7229	166.447	113.411	Cytochrome P450
AGAP012292	CYP9J4	3L	2.02295		2.55855	2784.86	5633.08	7124.72	Cytochrome P450
AGAP013128	CYP6AA2	2R	2.41147		3.136	1321.08	3184.97	4142.26	Cytochrome P450
AGAP008206	CYP6N2	3R	2.02568		2.21851	454.621	920.994	1008.74	Cytochrome P450
AGAP003067	CYP304C1	2R	2.58998		2.75679	293.43	759.909	808.982	Cytochrome P450
AGAP010077	CYP303A1	3R	3.6143		2.34683	68.9746	250.365	162.355	Cytochrome P450
AGAP008217	CYP6Z3	3R	41.423		63.7857	86.2042	3571.86	5500.8	Cytochrome P450
AGAP012291	CYP9J3	3L	3.03113		3.1554	1470.99	4457.96	4641.19	Cytochrome P450
AGAP008210	CYP6N1	3R	6.40125		8.17097	32.5902	208.061	265.634	Cytochrome P450
AGAP013241	CYP4D16	2R	3.3442		7.44926	16.8088	55.8552	124.607	Cytochrome P450
AGAP008020	CYP12F2	3R	2.04245		3.45695	3210.77	6556.9	11098.4	Cytochrome P450
AGAP008213	CYP6M3	3R	4.0379		6.7044	2324.36	9384.57	15582.4	Cytochrome P450
AGAP002867	CYP6P4	2R	3.48921		4.51832	482.587	1683.39	2179.58	Cytochrome P450
AGAP000500	Cpr	X	2.78672		2.98881	12876.2	35876	38479.8	Cytochrome P450
AGAP012850	AGAP012850	UNKN	4.25613		3.45518	170.555	725.691	589.032	Cytochrome P450
AGAP010966	AGAP010966	3L	2.91232		3.14326	22.7886	66.2454	71.5683	Cytochrome P450
AGAP007589	UGT306A2	2L	2.15853		2.40416	1255.07	2708.84	3017.63	glucosyltransferase
AGAP007990	UGT308G1	3R	50.7913		105.099	701.184	35599.5	73663.6	glucosyltransferase
AGAP006223	UGT302A2	2L	2.91168		4.18682	594.025	1729.91	2487.85	glucosyltransferase
AGAP005754	UGT308F1	2L	2.7136		3.66564	62.875	170.397	230.074	glucosyltransferase
AGAP005751	UGT308H1	2L	4.0759		4.25819	162.755	664.461	694.024	glucosyltransferase
AGAP007920	UGT36C2	3R	5.85824		7.3518	1448	8481.24	10644	glucosyltransferase
AGAP007374	UGT49A3	2L	3.66342		4.38337	1289.92	4723.8	5652.78	glucosyltransferase
AGAP002783	UGT314A2	2R	2.89452		2.72248	1586.58	4591.41	4318.64	glucosyltransferase
AGAP004165	GSTD2	2R	7.6675		7.76232	15.8063	120.707	122.257	Glutathione S-transferase
AGAP009342	GSTU3	3R	2.89712		2.52911	108.517	315.428	275.162	Glutathione S-transferase
AGAP012839	AGAP012839	UNKN	55.5163		33.5025	0.384073	27.7741	16.4736	Glutathione S-transferase
AGAP012156	ABCA5	3L	2.15629		2.19666	489.207	1054.73	1074.79	ABC Transporter
AGAP008437	ABCC9	3R	7.73255		9.01246	2756.2	21311.2	24840.3	ABC Transporter
AGAP012005	ABCF3	3L	3.44043		3.5587	353.017	1214.19	1255.87	ABC Transporter
AGAP028013	CPLCP25	3L	4.33418		8.33423	3.83343	16.1296	31.3305	Cuticular
AGAP010887	CPR113	3L	3.89574		4.81779	347.154	1352.38	1672.58	Cuticular
AGAP006369	CPR144	2L	11.8693		7.00701	123.967	1471.75	868.659	Cuticular
AGAP000877	CYP4G17	X	2.52636		2.89844	3412.17	8617.98	9888.07	Cuticular
AGAP008141	AGAP008141	3R	2.53322	-2.00527	5.07979	1428.55	3617.85	7255.05	Argininosuccinate
AGAP002207	CYP325C1	2R	3.35617	-3.73283	12.528	18.9711	63.8416	237.869	Cytochrome P450
AGAP000818	CYP9K1	X	4.67665	-2.41392	11.2891	15993.3	74780.8	180527	Cytochrome P450
AGAP008219	CYP6Z1	3R	6.03483	-2.03885	12.3041	1500.94	9055.52	18463.5	Cytochrome P450
AGAP008212	CYP6M2	3R	3.75941	-2.26593	8.51855	3240.24	12179.8	27600	Cytochrome P450
AGAP008358	CYP4H17	3R	8.37974	-2.48294	20.8064	104.322	873.34	2168.81	Cytochrome P450
AGAP005752	UGT308A2	2L	2.09681	-1.70538	3.57586	3615.47	7579.35	12927.3	glucosyltransferase
AGAP006222	UGT302A1	2L	7.40698	-2.15371	15.9525	715.745	5300.62	11416.8	glucosyltransferase
AGAP011366	COE18026	3L	3.60827			33.7915	121.508	43.1831	carboxylesterase
AGAP028697	AGAP028697	3L	4.95288			26.1296	130.038	46.2351	carboxylesterase
AGAP005834	COEJHE2E	2L	2.56335			756.564	1938.74	1414.41	carboxylesterase
AGAP013509	AGAP013509	2R	2.01476			332.434	669.058	497.668	carboxylesterase
AGAP005833	COEJHE1E	2L	3.3915			58.1401	197.495	86.7108	carboxylesterase
AGAP008051	SAP1	3R	2.237			1427.92	3193.96	2299.61	Chemosensory protein
AGAP002555	CYP325K1	2R	4.58018			36.1952	165.891	91.4257	Cytochrome P450
AGAP013224	CYP4H26	2R	4.93227			7.07466	35.5783	18.2284	Cytochrome P450
AGAP009241	AGAP009241	3R	2.01646			108.473	218.23	160.715	Cytochrome P450
AGAP008980	AP	3R	2.04534			178.378	364.858	248.954	Transcription factor
AGAP028176	DIMM	3R	2.0408			61.6357	126.271	69.229	Transcription factor
AGAP000431	DMRT99B	X	2.62667			57.4337	150.863	73.5464	Transcription factor
AGAP007782	GCM	3R	2.69995			94.1191	253.752	194.1	Transcription factor
AGAP003406	CG15696	2R	8.65722			7.13776	62.7693	21.1074	Transcription factor
AGAP012356	CPLCP27	3L	16.6673			0.837041	12.5038	1.6085	Cuticular
AGAP010121	CPR149	3R	25.829			0	4.80303	6.83191	Cuticular
AGAP008478	CPLCW7	3R	6.46302			3.31915	21.021	15.0782	Cuticular
AGAP005966	CPR17	2L	3.47839			16.8368	58.2947	33.6707	Cuticular
AGAP010717	AGAP010717	3L	2.01536			66.9531	135.038	93.1041	Cuticular
AGAP004576	TWDL12	2R	2.15711			41.6859	89.6054	82.3494	Cuticular
AGAP003334	CPLCX2	2R	2.43896			342.724	835.927	720.741	Cuticular
AGAP003254	AGAP003254	2R	13.0031			0.960182	12.9755	8.80506	Gustatory receptor
AGAP001173	Gr52	2R	3.43168			66.7184	229.114	124.525	Gustatory receptor
AGAP009855	Gr7	3R	11.64			2.69869	31.9946	8.1981	Gustatory receptor
AGAP013436	Ir140.2	2R	7.89849			12.1654	94.8039	53.5195	Ionotropic receptor
AGAP010272	IR25a	3R	2.54568			447.539	1138.97	813.782	Ionotropic receptor
AGAP001812	IR75h.2	2R	2.2962			68.5963	157.371	100.621	Ionotropic receptor
AGAP007498	IR75k	2L	2.87992			118.285	339.838	217.339	Ionotropic receptor
AGAP013172	IR7y	X	3.09216			38.2441	118.505	39.3042	Ionotropic receptor
AGAP009520	Or10	3R	2.47751			21.5236	53.0548	31.6977	Odorant binding
AGAP007797	Or23	3R	6.21504			7.10682	43.4623	17.4884	Odorant binding
AGAP009111	Or29	3R	14.0011			0.807946	10.3487	10.0394	Odorant binding
AGAP011469	OR3	3L	5.81375			4.04027	23.3855	10.5641	Odorant binding
AGAP002639	Or39	2R	7.06659			11.5083	81.2354	33.4493	Odorant binding
AGAP011468	Or4	3L	4.69641			5.74843	27.1751	8.65573	Odorant binding
AGAP000230	Or52	X	4.57293			19.2226	88.2181	42.3152	Odorant binding
AGAP004067	Or58	2R	2.33372			80.2299	187.223	120.905	Odorant binding
AGAP002189	OBP14	2R	3.24782			22.5038	72.1545	44.0131	Odorant binding
AGAP006078	Obp52	2L	4.10869			9.27925	38.0471	35.7977	Odorant binding
AGAP006079	Obp53	2L	8.6842			10.2394	88.871	44.283	Odorant binding
AGAP009629	OBP5	3R	2.60442			238.121	619.926	469.784	Odorant binding
AGAP002866	CYP6P5	2R		1.72986		470.531	734.789	424.702	Cytochrome P450
AGAP005774	CYP49A1	2L		1.65271		1072.72	1458.01	882.269	Cytochrome P450
AGAP008205	CYP6R1	3R		2.13063		107.445	179.292	84.5911	Cytochrome P450
AGAP008682	CYP307B1	3R		6.26155	-3.99974	23.0244	36.1971	6.03435	Cytochrome P450
AGAP005658	CYP15B1	2L		2.69682	-2.74097	137.714	135.416	50.0935	Cytochrome P450
AGAP000194	CYP4C25	X		2.31701		54.1639	93.0573	40.3104	Cytochrome P450
AGAP001806	AGAP001806	2R		1.62741		1569.97	2194.21	1348.19	glucosyltransferase
AGAP005639	ABCB2	2L		1.59862		8691.02	10357.8	6479.78	ABC Transporter
AGAP006427	ABCC7	2L		1.77067		2514.53	3312.54	1871	ABC Transporter
AGAP009463	ABCG11	3R		1.62643		4633.36	7476.12	4597.09	ABC Transporter
AGAP008889	ABCG15	3R		1.52534		3182.27	5732.49	3758.29	ABC Transporter
AGAP001536	ATF3	2R		1.78436		3788.34	4700.11	2634.17	Transcription factor
AGAP029575	AOP	3R		1.94568		1156.69	1597.92	821.193	Transcription factor
AGAP000317	BGB	X		1.88932		258.996	353.82	187.427	Transcription factor
AGAP006453	BTBVII	2L		1.81725		326.103	648.191	356.76	Transcription factor
AGAP001880	GT	2R		7.30428		15.758	42.2862	5.79662	Transcription factor
AGAP000237	CREBB	X		1.62566		2625.28	2450.3	1507.9	Transcription factor
AGAP011096	SLBO	3L		1.78328	-2.19884	565.621	458.409	257.23	Transcription factor
AGAP001761	SCHLANK	2R		1.67304		2032.1	3824.51	2285.66	Transcription factor
AGAP013178	CHES-1-LIKE	2R		1.93111		4806.95	8571.75	4439.05	Transcription factor
AGAP005711	CLK	2L		2.26381		3482.47	5061.57	2235.88	Transcription factor
AGAP029983	CT	2R		2.19614		3056.98	5649.73	2572.59	Transcription factor
AGAP011038	CREBA	3L		1.75002	-3.25605	1110.59	596.955	341.274	Transcription factor
AGAP004050	DSX	2R		1.50576		10872.8	14108.7	9370.45	Transcription factor
AGAP009807	AGAP009807	3R		1.64997		283.769	418.151	253.641	Transcription factor
AGAP029539	ECR	3L		1.5384		6150.24	7023.41	4565.67	Transcription factor
AGAP007327	EIP74EF	2L		2.33883		2081.86	3206.06	1371.19	Transcription factor
AGAP011341	ETS98B	3L		1.63128		2733.97	2989.22	1832.72	Transcription factor
AGAP005661	FTZ-F1	2L		2.01152		4446.98	8271.03	4112.24	Transcription factor
AGAP004228	GRN	2R		2.18222		885.273	1725.97	790.932	Transcription factor
AGAP012342	E(SPL)MBETA-HLH	3L		2.0849		117.147	233.471	112.15	Transcription factor
AGAP006699	H	2L		1.78423		701.426	1076.25	603.211	Transcription factor
AGAP029908	HSF	3L		1.67538		14898.6	22551.7	13461.7	Transcription factor
AGAP002431	HGTX	2R		2.56005		90.1261	165.906	64.629	Transcription factor
AGAP029242	REPO	2R		1.75891		1037.73	1993.92	1134	Transcription factor
AGAP002178	HTH	2R		1.72842		1761.92	2555.92	1478.97	Transcription factor
AGAP003669	DR	2R		2.13038	-2.05155	445.352	462.148	217.125	Transcription factor
AGAP000484	SLOU	X		3.00505	-2.49714	130.471	157.035	52.2521	Transcription factor
AGAP006747	REL2	2L		2.33219	-3.28633	8523.62	6047.88	2593.29	Transcription factor
AGAP000099	STAT2	X		1.52103		8921.16	10519.1	6916.18	Transcription factor
AGAP007038	LUNA	2L		1.8468		1299.72	1478.6	800.525	Transcription factor
AGAP009399	HR39	3R		1.79134		320.197	458.969	256.149	Transcription factor
AGAP008382	HR78	3R		1.73117		1535.51	1694.29	978.832	Transcription factor
AGAP000057	SV	X		1.84993		1018.66	1806.51	976.878	Transcription factor
AGAP000063	TOY	X		2.66149		375.285	708.971	266.407	Transcription factor
AGAP012389	PAN	3L		1.82607		1363.04	1555.23	851.763	Transcription factor
AGAP012345	PDM3	3L		1.79897		1829.17	1820.34	1011.82	Transcription factor
AGAP001493	POXM	X		2.88968		96.4572	202.277	70.035	Transcription factor
AGAP005156	RETN	2L		1.64709		1057.73	1792.85	1088.66	Transcription factor
AGAP005096	RX	2L		2.11597		124.761	209.923	99.3429	Transcription factor
AGAP011902	RIB	3L		5.68442	-5.12203	72.8028	81.0182	14.1655	Transcription factor
AGAP010922	SOX21B	3L		1.82403		138.77	274.37	150.685	Transcription factor
AGAP002082	SQZ	2R		1.68971		1191.63	1454.93	861.197	Transcription factor
AGAP012411	AGAP012411	3L		1.51157		1113.57	1035.84	685.135	Transcription factor
AGAP010030	TJ	3R		1.68389		398.664	608.428	361.263	Transcription factor
AGAP008814	DA	3R		1.51123		1124.38	1612.15	1066.69	Transcription factor
AGAP000512	SD	X		1.53089		1938.17	2988.37	1952.31	Transcription factor
AGAP003885	LMD	2R		1.88147		152.785	166.511	88.3842	Transcription factor
AGAP027993	CPLCP10	3R		3.14519		74.9824	108.711	34.4117	Cuticular
AGAP010900	CPF1	3L		5.81328		39.6424	46.7566	7.66741	Cuticular
AGAP010901	CPF2	3L		8.33513		21.0365	31.1466	3.8275	Cuticular
AGAP008454	CPLCG10	3R		43.4997	-55.7096	10.1502	7.93055	0	Cuticular
AGAP008480	CPLCG27	3R		15.3361		2.84736	11.4936	0.803774	Cuticular
AGAP006095	CPR106	2L		4.51875		24.9941	30.2653	6.84744	Cuticular
AGAP006839	CPR67	2L		75.0282	-32.1404	9.981	22.7112	0.291408	Cuticular
AGAP001664	CPR1	2R		4.59492	-3.40509	121.7	164.091	35.6421	Cuticular
AGAP008960	AGAP008960	3R		3.05414	-4.16147	76.704	56.7603	18.6737	Cuticular
AGAP006931	CPR111	2L		5.00044		46.1775	132.348	26.5075	Cuticular
AGAP003377	CPR115	2R		2.67451		48.3708	88.2123	33.2207	Cuticular
AGAP003380	CPR118	2R		2.8559		91.8499	133.514	46.7673	Cuticular
AGAP003383	CPR121	2R		2.44192		56.4897	99.6297	40.6037	Cuticular
AGAP001669	CPR6	2R		2.7108	-4.37984	325.245	201.245	74.3334	Cuticular
AGAP006321	CPR71	2L		22.5009		6.86508	11.4354	0.484613	Cuticular
AGAP000352	TWDL1	X		5.96572	-2.98799	64.4709	128.344	21.3926	Cuticular
AGAP013269	AGAP013269	2R		25.5018		6.85586	12.8664	0.582816	Cuticular
AGAP001329	CPLCX1	2R		2.04534		204.849	294.395	144.121	Cuticular
AGAP003375	AGAP003375	2R		5.40061		30.3805	87.7664	16.3439	Cuticular
AGAP009162	AGAP009162	3R		5.74203	-4.57944	35.7488	44.5469	7.69634	Cuticular
AGAP012795	AGAP012795	UNKN		4.0004		23.9566	39.1227	9.6797	Cuticular
AGAP012866	AGAP012866	UNKN		4.38052	-2.62986	60.3831	100.714	22.8552	Cuticular
AGAP000786	AGAP000786	X		1.80334		436.419	713.28	395.364	Cuticular
AGAP006705	AGAP006705	2L		2.4623		132.166	235.656	96.1462	Cuticular
AGAP003098	Gr23	2R		2.10784	-2.26316	105.254	98.0373	46.4329	Gustatory receptor
AGAP006717	Gr26	2L		1.94397		97.6675	173.143	89.0758	Gustatory receptor
AGAP009256	Gr44	3R		3.71812		59.2123	151.557	40.7703	Gustatory receptor
AGAP001170	Gr48	2R		4.75037		42.2645	89.9645	18.8289	Gustatory receptor
AGAP001171	AGAP001171	2R		2.35681		67.6651	109.043	46.0431	Gustatory receptor
AGAP006027	GLURI	2L		1.6896		1245.15	1690.69	1000.76	Ionotropic receptor
AGAP000140	IR100a	X		3.32538	-2.08201	126.419	201.827	60.8184	Ionotropic receptor
AGAP005678	IR134	2L		2.06243	-2.4584	335.089	281.142	136.142	Ionotropic receptor
AGAP005679	IR135	2L		2.30933	-2.83196	185.62	151.336	65.4387	Ionotropic receptor
AGAP013154	IR7h.1	X		3.53557		102.868	163.372	46.1083	Ionotropic receptor
AGAP013409	IR7s	X		4.16582		72.393	131.901	31.6447	Ionotropic receptor
AGAP013520	IR7x	X		3.18436		53.6173	99.4073	31.5675	Ionotropic receptor
AGAP005527	AGAP005527	2L		1.8009		1173.78	1692.59	940.231	Ionotropic receptor
AGAP006666	Or48	2L		1.8977		691.311	903.28	475.979	Odorant binding
AGAP011989	Or63	3L		1.83817		332.509	383.299	208.621	Odorant binding
AGAP011990	Or64	3L		1.872		281.598	398.324	212.534	Odorant binding
AGAP002046	Or76	2R		6.00018		13.567	21.2147	3.5492	Odorant binding
AGAP002025	OBP11	2R		1.92571		212.61	278.214	144.517	Odorant binding
AGAP006368	Obp69	2L		5.03168		17.4778	40.338	8.05043	Odorant binding
AGAP012296	CYP9J5	3L			3.18444	3983.55	6514.39	12684.4	Cytochrome P450
AGAP013511	CYP6AG2	2R		-2.29468	2.38623	5872.29	6105.64	14011.3	Cytochrome P450
AGAP002865	CYP6P3	2R			2.08523	4105.43	5647.98	8560.16	Cytochrome P450
AGAP002417	CYP4AR1	2R			2.36613	1274.68	2112.01	3015.25	Cytochrome P450
AGAP003343	CYP6AG1	2R		-1.78914	2.85587	5304.49	8465.33	15146.7	Cytochrome P450
AGAP012957	CYP4D17	2R		-1.62764	2.17325	1080.25	1441.47	2346.74	Cytochrome P450
AGAP013305	CYP4H25	2R			2.62483	55.3372	106.156	144.777	Cytochrome P450
AGAP002449	UGT50B2	2R			2.58423	146.122	259.552	377.16	glucosyltransferase
AGAP005750	UGT308B2	2L		-1.60878	2.5589	4431.79	7047.91	11338.8	glucosyltransferase
AGAP007588	UGT306C1	2L			2.00229	1477.26	2484.82	2957.62	glucosyltransferase
AGAP007029	UGT302H2	2L			2.62693	1820.32	2830.68	4781.3	glucosyltransferase
AGAP005753	UGT308C2	2L			2.50245	1485.15	2500.8	3715.92	glucosyltransferase
AGAP004164	GSTD1-4	2R			2.44714	9200.19	17202.6	22511.3	Glutathione S-transferase
AGAP000165	GSTMS1	X			3.35654	2713.39	5396.26	9106.95	Glutathione S-transferase
AGAP000163	GSTMS2	X			2.33362	323.96	600.794	755.819	Glutathione S-transferase
AGAP010064	AGAP010064	3R			2.1576	669.28	1119.21	1443.23	ABC Transporter
AGAP011761	AGAP011761	3L		-1.59214	2.10549	389.641	515.143	820.093	ABC Transporter
AGAP000076	SREBP	X			2.02139	2906.75	5530.13	5874.41	Transcription factor
AGAP006009	CPR30	2L			2.42307	138.8	260.435	336.686	Cuticular
AGAP009871	CPR75	3R		-2.30044	2.46148	13411.3	14347.2	33008.1	Cuticular
AGAP009877	CPR79	3R			2.10361	331.335	494.621	697.39	Cuticular
AGAP001076	CYP4G16	X		-2.698	2.87128	14750.2	15694.4	42345.9	Cuticular
AGAP028413	AGAP028413	3L			3.66407	25.2966	49.3713	92.3261	Cuticular

## Sheet: 1X5X10X
Table S2.3. Genes overexpressed in dose response associated with pyrethroid resistance escalation in An. gambiae in Cameroon
Gene ID	10x-1x	5x-1x	10x-5x	KIS	PERM10X	PERM5X	PERM1X	MAN_UNX	Description	Chr
AGAP002198	4.77608	2.26158	2.11183	4160.37	7701.25	3148.76	1456.58	3673.62	Glycine N-methyltransferase	2R	methylation
AGAP003015	5.96464	2.27339	2.62368	313.095	3381.96	1113	512.188	375.23	Argininosuccinate synthase	2R	argininosuccinate
AGAP009217	7.21267	2.73737	2.63488	93.7348	5150.45	1687.8	645.052	801.467	CLIPB12: CLIP-domain serine protease	3R	serine proteases
AGAP009381	15.0324	3.76632	3.99126	387.713	272.442	58.9387	44.1285	58.2536	Cellular retinaldehyde-binding protein	3R	Modulates olfactor response						Ma et al 2019
AGAP010123	9.23282	3.87424	2.38313	391.268	654.52	237.144	64.0374	109.811	CPR131: cuticular protein RR-2 family 131	3R	cuticular resistance
AGAP004962	5.4651	2.09448	2.60929	682.58	6643.57	2198.45	1098.12	738.779	cyclin B	2L	regulation of cell cycle progression; often differentially expressed in tumors
AGAP004963	4.95549	2.15207	2.30266	448.571	4241.3	1590.4	773.139	531.452	cyclin B	2L	regulation of cell cycle progression; often differentially expressed in tumors
AGAP006709	9.69059	4.8281	2.00712	1245.45	5271.56	2267.79	491.399	871.314	CHYM1: Chymotrypsin-1	2L	protease
AGAP006710	10.0892	4.82193	2.09237	1334.51	4545.44	1875.76	406.971	804.058	CHYM2: chymotrypsin	2L	protease
AGAP006385	27.9	8.8	3.2	28.3	4602.6	1252.7	149.096	66.5024	chymotrypsinogen B	2L	protease
AGAP007453	4.48727	2.06024	2.17803	1802.58	8534.53	3383.41	1718.08	1277.43	LRIM9: leucine-rich immune protein (Short)	2L	immune response
AGAP007455	5.73653	2.24558	2.55459	1982.4	5402.34	1825.99	850.703	923.047	LRIM10: leucine-rich immune protein (Short)	2L	immune response
AGAP011434	7.30729	2.32577	3.14188	42.7532	83.4676	22.9385	23.8455	42.1904	zinc carboxypeptidase A 1	3L	digestive enzyme
AGAP011507	4.21733	2.01906	2.08876	774.788	1628.09	673.018	348.727	424.834	COE13O: carboxylesterase	3L	esterase
AGAP003144	3.58967	3.81129		11.9703	6.27354	5.60933	1.22829	8.15479	aga-bantam:	2R	micrRNA; post-transcriptional GENE regulation
AGAP013659	3.53975	4.80178		68.7521	86.6442	101.486	22.1112	57.8636	aga-mir-1174:	2R	micrRNA; post-transcriptional GENE regulation
AGAP013569	3.79297	3.79615		18.1524	11.3232	9.78522	7.28043	6.14298	aga-mir-1175:	2R	micrRNA; post-transcriptional GENE regulation
AGAP008394	2.16176	3.06871		19.565	11.4242	14.0027	4.77379	10.3417	aga-mir-125:	3R	micrRNA; post-transcriptional GENE regulation
AGAP028760	3.24734	3.20976		5.23971	3.43584	3.09308	0.537628	1.9484	aga-mir-2-2:	2L	micrRNA; post-transcriptional GENE regulation
AGAP012349	2.49035	2.34183		11.4016	16.3866	13.3052	5.94393	6.90016	aga-mir-308:	3L	micrRNA; post-transcriptional GENE regulation
AGAP013705	3.16751	2.18779		14.583	11.8693	7.07864	3.38495	7.60154	aga-mir-989:	3L	micrRNA; post-transcriptional GENE regulation
AGAP007036	2.41545	2.11748		506.127	1220.9	924.14	456.591	579.188	APL1A: Anopheles Plasmodium-responsive Leucine-Rich Repeat 1A	2L	immune response
AGAP007033	3.08406	2.39892		5423.76	10811.9	7261.59	3166.82	3990.43	APL1C: Anopheles Plasmodium-responsive Leucine-Rich Repeat 1C	2L	immune response
AGAP028491	3.13008	2.72169		6025.65	10285.7	7722.45	2968.41	6627.51	AQP2: aquaporin	3L	water channel proteins, facilitating transport of water between cells
AGAP010326	3.53551	6.09084		1752.1	1065.67	1585.2	272.279	250.121	AQP3: aquaporin	3L	water channel proteins, facilitating transport of water between cells
AGAP001138	3.03966	2.24116		102072	162413	103397	48266	119488	ATPsynB: F-type H+-transporting ATPase subunit b	2R	responsible for synthesizing ATP (adenosine triphosphate) by harnessing the energy from a proton gradient across the membrane.
AGAP004616	4.15217	2.91085		30502.8	57985.5	35099.6	12615.1	42913.8	ATPsynCF6: F-type H+-transporting ATPase subunit 6	2R	responsible for synthesizing ATP (adenosine triphosphate) by harnessing the energy from a proton gradient across the membrane.
AGAP006879	3.15722	2.64097		55734.4	71569.6	51692.2	20477.1	61189.1	ATPsynE: F-type H+-transporting ATPase subunit e	2L	responsible for synthesizing ATP (adenosine triphosphate) by harnessing the energy from a proton gradient across the membrane.
AGAP000260	2.80404	2.94024		16984.9	19992.4	18100.9	6440.57	25159.1	ATPsynepsilon: mitochondrial ATP synthase epsilon chain	X	responsible for synthesizing ATP (adenosine triphosphate) by harnessing the energy from a proton gradient across the membrane.
AGAP012515	3.63158	3.16216		33827.9	84343.5	63412.9	20979.8	68220.4	ATPsynF: F-type H+-transporting ATPase subunit f	UNKN	responsible for synthesizing ATP (adenosine triphosphate) by harnessing the energy from a proton gradient across the membrane.
AGAP009491	2.43741	2.08532		24002.8	51775.3	38247.7	19188.4	43258.1	ATPsynG: F-type H+-transporting ATPase subunit g	3R	responsible for synthesizing ATP (adenosine triphosphate) by harnessing the energy from a proton gradient across the membrane.
AGAP012544	3.25219	2.25802		8.7964	136.079	81.5794	37.7972	131.144	CASPS14: short caspase 14	UNKN	family of endoproteases that provide critical links in cell regulatory networks controlling inflammation and cell death
AGAP004921	3.13836	2.08013		1702.15	1094.11	626.164	314.923	772.521	CASPS5: short caspase 5	2L	family of endoproteases that provide critical links in cell regulatory networks controlling inflammation and cell death
AGAP006711	10.8016	5.82798		8769.26	29451.5	13720.6	2463	4693.94	chym3: Chymotrypsin-2	2L	Protease
AGAP011791	3.16977	2.31332		5115.3	6395.24	4029.97	1822.53	1730.74	CLIPA1: CLIP-domain serine protease	3L	immune response
AGAP010731	3.32719	2.18098		940.911	3914.34	2215.49	1062.74	1104.44	CLIPA8: CLIP-domain serine protease	3L	immune response
AGAP004719	4.09447	3.01284		481.1	1013.35	643.838	223.567	422.345	CLIPC9: CLIP-domain serine protease	2L	immune response
AGAP006723	3.7514	3.20117		678.131	1118.1	823.824	269.236	1074.21	COEAE2G: carboxylesterase	2L	Detox
AGAP011509	2.67217	2.47164		300.305	877.73	701.002	296.717	395.963	COEunkn: carboxylesterase	3L	Detox
AGAP004690	2.4646	2.95482		261.344	118.618	122.792	43.4759	78.0892	CPF3: cuticular protein 3 from fifty-one aa family	2L	cuticular resistance
AGAP028016	3.95567	3.5285		6.27036	15.8361	12.1971	5.15335	9.48199	CPLCP15: cuticular protein (putative) CPLCP15	3L	cuticular resistance
AGAP028208	12.5861	8.83232		22.2865	37.6859	22.8349	3.5528	26.1916	CPLCP22: cuticular protein (putative) CPLCP22	3L	cuticular resistance
AGAP012487	4.5264	5.48794		16.3806	14.1252	14.7873	7.99166	4.24132	CPR152: cuticular protein RR-2 family 152	UNKN	cuticular resistance
AGAP005999	4.26937	7.62719		194.925	34.841	53.7439	54.4042	97.1745	CPR24: cuticular protein RR-1 family 24	2L	cuticular resistance
AGAP006001	2.2985	3.53924		21122.7	7022.05	9336.15	2759.73	13899.6	CPR26: cuticular protein RR-1 family 26	2L	cuticular resistance
AGAP009874	3.69236	5.05507		7347.76	8087.16	9559.97	1978.5	10772.3	CPR76: cuticular protein RR-1 family 76	3R	cuticular resistance
AGAP010124	2.82755	3.45335		9.10502	6.22527	6.56485	3.9598	1.34078	CPR98: cuticular protein RR-2 family 98	3R	cuticular resistance
AGAP005335	4.38232	4.22185		286.637	735.319	611.664	151.571	277.69	CTL4: C-type lectin (CTL)	2L	immune responses		Possible Role in Resistance:				https://doi.org/10.3390/insects12010003
AGAP005334	3.76507	3.11242		856.865	2640.81	1884.95	633.591	721.513	CTLMA2: C-type lectin (CTL) - mannose binding	2L			The upregulation of CTLs in response to insecticide exposure suggests that they might be involved in detoxification processes or other mechanisms that contribute to resistance. For instance, some CTLs might bind to insecticides or their metabolites, preventing them from reaching their targets or interfering with their actio
AGAP007407	2.26911	2.79511		333.999	494.853	526.328	196.999	335.035	CTLMA4: C-type lectin (CTL) - mannose binding	2L
AGAP009241	4.563	2.38196		94.9697	849.696	382.988	168.212	149.956	CYP4C36: cytochrome P450	3R	Detox
AGAP001076	3.01213	2.65355		17699.9	51456.5	39140.9	15431.6	49655.8	CYP4G16: cytochrome P450	X	cuticular resistance
AGAP007480	2.28321	2.00816		1819.46	2550.06	1936.6	1008.9	1681.65	CYP6AH1: cytochrome P450	2L	detox
AGAP008278	2.47138	2.99212		2358.57	902.449	943.411	329.86	847.725	D7L1: D7 long form salivary protein	3R	Salivary protein
AGAP008279	2.28398	3.43103		2056.29	2010.51	2607.81	795.169	1831.46	D7L2: D7 long form salivary protein	3R	Salivary protein
AGAP028120	2.08672	2.38232		315.306	373.042	367.733	161.488	311.484	D7L3: D7 long form salivary protein	3R	Salivary protein
AGAP008284	3.83884	2.5085		7642.8	9377.23	5290.87	2206.58	6467.12	D7r1: D7 short form salivary protein	3R	Salivary protein
AGAP008282	4.76116	2.53672		8695.68	14426	6636.57	2737.02	7542.59	D7r2: D7 short form salivary protein	3R	Salivary protein
AGAP008281	4.98719	3.16994		4304.95	7356.14	4037.22	1332.41	4256.08	D7r4: D7 short form salivary protein	3R	Salivary protein
AGAP003178	3.30526	2.46954		866.098	1136.4	733.125	310.577	771.838	GRX2: glutaredoxin	2R
AGAP004378	4.41363	4.20553		2800.15	1564.17	1286.9	320.134	607.913	GSTD11: glutathione S-transferase delta class 11	2R	Detox
AGAP009197	3.38749	2.2914		1077.88	2011.36	1174.76	536.362	1608.01	GSTE3: glutathione S-transferase epsilon class 3	3R	Detox
AGAP011845	3.76717	2.18348		520.492	2698.7	1350.6	647.12	732.602	Histone H2A	3L	epigenetics
AGAP012555	3.50381	3.3814		14.2687	15.4589	12.8817	3.98551	3.38696	histone H2B	UNKN	epigenetics
AGAP012199	2.84592	2.03748		988.251	1273.57	787.279	404.244	476.425	Histone H2B	3L	epigenetics
AGAP012201	5.65212	6.18953		302.776	357.252	337.8	57.0965	153.497	Histone H2B	3L	epigenetics
AGAP012202	2.57572	2.61441		1731.53	2005.31	1757.5	703.282	1097.22	Histone H2B	3L	epigenetics
AGAP012574	2.49472	2.19375		325.016	182.088	138.256	65.9333	106.104	Histone H4	UNKN	epigenetics
AGAP007045	3.23768	2.0556		589.544	1619.42	887.77	451.825	404.51	LRIM15: leucine-rich immune protein (TM)	2L	immune responses
AGAP028028	4.70564	3.76044		634.276	5200.76	3588.59	998.373	1146.85	LRIM16A: Leucine-rich immune protein (TM)	3R	immune responses
AGAP028064	3.67141	3.00657		4300.39	2548.82	1802.26	627.122	1129.67	LRIM16B: Leucine-rich immune protein (TM)	3R	immune responses
AGAP012867	2.43668	2.38109		18.9643	83.5887	70.5281	30.988	60.8258	odorant-binding protein	UNKN	Olfactory
AGAP009111	2.37209	3.68704		2.5372	6.17863	8.29234	2.37127	5.7362	Or29: odorant receptor 29	3R	Olfactory
AGAP009706	2.12038	3.61659		20.1047	6.75579	10.3469	4.57886	11.4028	Or70: odorant receptor 70	3R	Olfactory
AGAP001425	4.9018	2.90104		43.5482	197.756	101.057	36.4434	76.8558	Sulfotransferase (Sult)	2R	Detox
AGAP010815	2.78899	2.13142		28185.5	16834.5	11108.6	5452.54	6568.97	TEP1: Thioester-containing protein 1	3L	Immune responses
AGAP008654	3.13228	2.02481		7826.45	6635.55	3703.73	1913.65	2132.88	TEP12: thioester-containing protein 12	3R	Immune responses
AGAP010813	2.93012	2.03892		745.626	73.7199	44.2931	22.7271	42.5133	TEP18: thioester-containing protein 18	3L	Immune responses
AGAP010298	2.04499	2.00086		11283.9	12913.8	10909.8	5704.39	13505.4	V-type H+-transporting ATPase subunit D	3R	ATP production
AGAP007300	2.99772		2.03947	284.271	2843.63	1203.91	856.896	443.281	alkaline phosphatase	2L	Detox
AGAP008783	3.81553		3.00357	292.352	916.752	263.544	217.041	522.961	Arginase	3R
AGAP008141	6.45636		3.87079	2866.25	28913.7	6449.72	4045.39	10203.7	argininosuccinate lyase	3R
AGAP009365	2.79823		2.84536	57.3258	33.9069	10.2894	8.69798	14.9034	cellular retinaldehyde binding protein	3R	Modulates olfactor response
AGAP009385	2.47127		3.37516	604.096	118.874	30.4109	43.4521	124.227	cellular retinaldehyde-binding protein	3R	Modulates olfactor response
AGAP006191	5.46065		3.41369	565.625	3736.64	945.138	618.134	827.327	Cht24: chitinase	2L	cuticular resistance
AGAP009215	2.21424		2.18616	306.622	854.316	337.422	348.529	336.456	CLIPB18: CLIP-domain serine protease	3R	immune responses
AGAP003689	2.54995		2.00511	1532.58	3960.27	1705.39	1402.94	1530.68	CLIPC7: CLIP-domain serine protease	2R	immune responses
AGAP009593	2.78817		2.18153	1489.12	13792.7	5459.15	4468.65	14786.1	CP: Zinc carboxypeptidase A 1	3R	Protease
AGAP028013	3.33855		2.97796	5.93712	137.185	39.7765	37.1189	30.3633	CPLCP25: cuticular protein (putative) CPLCP25	3L	cuticular resistance
AGAP028042	3.42286		3.42286	4.75873	13.4981	1		4	CPLCP6: cuticular protien (putative) CPLCP6	3R	cuticular resistance
AGAP012573	4.34373		3.68079	104.154	27.3636	6.41904	3.82034	13.8106	Histone H3	UNKN	epigenetics
AGAP012197	3.50772		2.00774	52.6868	220.723	94.9245	56.8419	32.212	Histone H3	3L	epigenetics
AGAP004036	2.75208		2.06294	406.699	2002.47	838.138	657.279	413.524	HPX7: heme peroxidase 7	2R	Stress response
AGAP002542	3.76324		2.90184	60.1405	232.981	69.3243	55.9248	52.0873	LRIM20: leucine-rich immune protein (Coil-less)	2R	immune responses
AGAP007454	4.64478		3.19554	1758.7	8883.8	2400.45	1727.74	1782.85	LRIM8A: leucine-rich immune protein (Short)	2L	immune responses
AGAP007456	4.45124		2.41217	1881.33	5981.88	2141.25	1213.95	1110.36	LRIM8B: leucine-rich immune protein (Short)	2L	immune responses
AGAP008052	10.4354		6.29093	28.6579	2205.83	302.757	190.945	50.253	SAP2: sensory appendage protein 2	3R	chemosensory protein
AGAP008296	3.50644		2.0714	24493	137785	57434.8	35496.1	55213.4	TRYP1: trypsin 1	3R	Protease
AGAP008295	4.80275		3.84706	753.903	2280.99	511.956	429.022	879.368	TRYP2: trypsin 2	3R	Protease
AGAP008294	2.55165		2.83604	20069.2	49379.5	15033.9	17481.2	58540.4	TRYP3: trypsin 3	3R	Protease
AGAP008292	2.03408		2.16963	63551.2	97216.2	38689.3	43173.4	156815	TRYP4: trypsin 4	3R	Protease
AGAP008290	2.65815		2.73962	1319.01	1823.4	574.685	619.654	2629.85	TRYP6: trypsin 6	3R	Protease
AGAP028759	2.52801			6.185	6.55901	2.72275	2.20399	4.24971	aga-mir-2-1:	2L	micrRNA; post-transcriptional GENE regulation
AGAP011302	2.01974			3250.12	5681.47	3599.99	2541.04	3682.15	alkaline phosphatase	3L	Detox
AGAP006400	2.52317			5496.51	2299.39	1435.81	823.211	1125.65	alkaline phosphatase 2	2L	Detox
AGAP008370	2.70093			22396.4	10267	5449.58	3433.81	8957.52	carboxypeptidase A	3R	Protease
AGAP011435	2.38498			1297.56	2555.72	1245.72	967.996	2593.51	carboxypeptidase A	3L	Protease
AGAP012945	2.04285			110.898	145.487	69.9025	64.3328	128.852	CASPS4 protein	UNKN	Stress response
AGAP011790	2.18991			4632.12	3568.58	1986.07	1472.02	1226.79	CLIPA2: CLIP-domain serine protease	3L	immune responses
AGAP001964	2.57464			181.638	325.6	184.68	114.239	183.464	CLIPA26: CLIP-domain serine protease	2R	immune responses
AGAP000290	2.07385			292.838	812.772	530.312	354.026	351.477	CLIPA27: CLIP-domain serine protease	X	immune responses
AGAP010968	3.87422			3006.54	8186.95	3641.46	1908.9	2597.59	CLIPA9: CLIP-domain serine protease	3L	immune responses
AGAP003251	3.08174			2111.59	5309.59	2435.42	1556.36	1654.44	CLIPB1: CLIP-domain serine protease	2R	immune responses
AGAP004855	2.63336			1647.25	3558.28	1894.8	1220.6	1532.16	CLIPB13: CLIP-domain serine protease	2L	immune responses
AGAP012037	2.00193			529.447	865.576	584.172	390.572	261.295	CLIPB20: CLIP-domain serine protease	3L	immune responses
AGAP003249	2.74123			1036.75	687.503	391.596	226.556	280.478	CLIPB3: CLIP-domain serine protease	2R	immune responses
AGAP002422	2.70878			261.721	1228.72	662.278	409.756	432.144	CLIPD1: CLIP-domain serine protease	2R	immune responses
AGAP006724	2.3026			489.037	1395.87	731.617	547.609	663.735	COEAE3G: carboxylesterase	2L	Detox
AGAP005372	3.05182			800.274	3305.62	1481.97	978.452	1131.73	COEBE3C: carboxylesterase beta esterase	2L	Detox
AGAP012355	3.19711				9.36592	8.42994	3.89731	0.455713	CPLCP16: cuticular protein (putative) CPLCP16	3L	cuticular resistance
AGAP006497	2.45075			440.331	139.566	66.8275	51.4431	111.995	CPR134: cuticular protein RR-2 family 134	2L	cuticular resistance
AGAP010098	2.4796			318.837	8.7034	4.48314	8.23165	18.7817	CPR83: cuticular protein RR-2 family 83	3R	cuticular resistance
AGAP007411	2.96154			100.901	324.42	149.603	98.9544	135.656	CTLMA1: C-type lectin (CTL) - mannose binding	2L	immune responses
AGAP007412	2.19714			135.203	658.394	315.546	270.69	378.874	CTLMA3: C-type lectin (CTL) - mannose binding	2L	immune responses
AGAP005992	2.89665			213.3	404.773	204.229	126.23	158.316	CYP302A1: cytochrome P450	2L	Detox
AGAP003066	2.13486			1686.18	2627.96	1668.33	1111.98	1411.52	CYP304B1: cytochrome P450	2R	Detox
AGAP001864	2.64294			485.388	568.195	340.11	194.203	276.759	CYP4H15: cytochrome P450	2R	Detox
AGAP028019	2.18392			889.223	535.972	404.11	221.692	513.743	CYP4H18: Cytochrome P450	3R	Detox
AGAP013305	2.0756			80.2747	322.442	176.417	140.331	209.214	CYP4H25: cytochrome P450	2R	Detox
AGAP013511	2.0249			7564.29	16651.6	11603.6	7428.45	18040.5	CYP6AG2: cytochrome P450	2R	Detox
AGAP008212	2.03728			3689.58	21557.5	13249.1	9558.59	28200.6	CYP6M2: cytochrome P450	3R	Detox
AGAP008214	2.14608			7554.49	12424.7	6256.09	5229.81	10230.8	CYP6M4: cytochrome P450	3R	Detox
AGAP008219	2.41214			3913.01	47525.9	33339.6	17798.1	39921.5	CYP6Z1: cytochrome P450	3R	Detox
AGAP008218	2.37382			800.098	29388.8	19497.1	11183.5	25707.5	CYP6Z2: cytochrome P450	3R	Detox
AGAP012296	2.16973			6964.21	28843.4	15971.6	12008.4	39353.6	CYP9J5: cytochrome P450	3L	Detox
AGAP007966	2.1931			104149	140035	106437	57679.7	126478	F-type H+-transporting ATPase subunit gamma	3R	ATP production
AGAP011107	2.42049			2481.3	3550.68	2435.55	1325.12	2330.92	GRX1: glutaredoxin	3L	Stress response
AGAP009738	2.32573			3826.2	6895.22	4017.34	2678.14	4844.56	GRX3: glutaredoxin	3R	Stress response
AGAP003415	2.59788			2275.64	3928.16	2450.1	1365.89	2251.21	Grx3p	2R	Stress response
AGAP009193	2.7328			4329.75	4406.33	2569.41	1456.51	3195.74	GSTE4: glutathione S-transferase epsilon class 4	3R	Detox
AGAP009192	2.04467			799.381	1242.48	881.338	548.924	989.707	GSTE5: glutathione S-transferase epsilon class 5	3R	Detox
AGAP009196	2.40702			227.467	452.619	275.913	169.863	334.144	GSTE7: glutathione S-transferase epsilon class 7	3R	Detox
AGAP000761	2.28098			982.134	1149.83	695.558	455.36	656.557	GSTT1: glutathione S-transferase theta class 1	X	Detox
AGAP000888	2.44015			418.233	893.687	460.09	330.837	565.85	GSTT2: glutathione S-transferase theta class 2	X	Detox
AGAP003264	2.25976			1187.62	2850.71	1494.43	1139.56	1351.45	histone acetyltransferase 1	2R	epigenetics
AGAP003228	2.17283			1322.79	2971.5	1718.15	1235.37	1397.21	histone acetyltransferase type B subunit 2	2R	epigenetics
AGAP003036	2.50875			1060.66	2134.7	1290.99	768.642	1119.55	histone deacetylase complex subunit SAP18	2R	epigenetics
AGAP012198	2.87324			0.149116	6.62711	3.21247	2.08352	4.54308	Histone H2A (Fragment)	3L	epigenetics
AGAP012894	2.70518			157.236	424.922	200.614	141.892	118.673	Histone H2B	UNKN	epigenetics
AGAP005024	2.75816			432.623	3584.78	1802.07	1174.05	1156	Histone H3	2L	epigenetics
AGAP005025	2.59205			884.054	7324.05	3279.36	2552.43	1867.73	Histone H3	2L	epigenetics
AGAP012196	2.34748			829.525	2178.46	1171.88	838.289	730.599	Histone H3	3L	epigenetics
AGAP004038	2.22497			2902.53	18017.3	7983.78	7314.96	3078.37	HPX8: heme peroxidase 8	2R	Stress response
AGAP006348	2.91172			6565.92	10221.8	5127.46	3171.2	2422.28	LRIM1: leucine-rich immune protein (Long)	2L	immune responses
AGAP005693	3.11803			28569.5	28690.7	13815.4	8312.02	11993	LRIM17: leucine-rich immune protein (Coil-less)	2L	immune responses
AGAP007037	3.09271			858.181	1851.04	868.906	540.659	760.367	LRIM3: leucine-rich immune protein (Long)	2L	immune responses
AGAP006327	2.73921			1170.58	5472.27	2591.23	1804.62	3914.88	LRIM6: leucine-rich immune protein (Short)	2L	immune responses
AGAP008215	2.20126			2113.91	1194.67	802.128	490.257	1146.98	SG7b: salivary gland protein 7-like	3R	Salivary protein
AGAP013724	2.0907			512.398	927.124	497.893	400.582	602.41	SG7c: salivary gland protein 7-like 3	3R	Salivary protein
AGAP008034	2.00237			2319.07	4166.46	2896.66	1879.62	2406.28	solute carrier family 39 (zinc transporter), member 7	3R	Excretion
AGAP010854	2.60456			1062.98	803.213	485.862	278.575	121.629	solute carrier family 45, member 1/2/4	3L	Excretion
AGAP008368	2.49623			13801.6	10053.5	5623.95	3638.14	4289.31	TEP14: thioester-containing protein 14	3R	immune responses
AGAP010814	2.97306			12246	9521.94	5381.68	2893.12	3082.33	TEP6: thioester-containing protein 6	3L	immune responses

## Sheet: BP_RSC_up
Table S2.4. Enriched Biological Processes Identified by GO Term Analysis from upregulated genes in RSC comparisons
BP_GO_terms	BP_GO_ID	total_genes_in_GO	Cands_in_GO	total_genes_in_background	GeneRatio	fold_enrichment	p_value	adj_p_value
negative regulation of transcription by RNA polymerase II	GO:0007225	691	79	13107	0.114327	1.32375	0.00280371	0.00280371
response to chemical	GO:1902950	325	39	13107	0.12	1.38943	0.0257661	0.0257661
cellular response to oxygen-containing compound	GO:0008306	191	30	13107	0.157068	1.81863	0.000976743	0.000976743
response to oxygen-containing compound	GO:1903532	204	29	13107	0.142157	1.64598	0.00731395	0.00731395
cellular response to organic cyclic compound	GO:0008292	125	24	13107	0.192	2.2231	0.000148803	0.000148803
defense response to Gram-negative bacterium	GO:0010468	154	23	13107	0.149351	1.72927	0.00826783	0.00826783
visual perception	GO:2001033	129	22	13107	0.170543	1.97465	0.00213875	0.00213875
response to oxidative stress	GO:1903530	149	20	13107	0.134228	1.55418	0.0386738	0.0386738
cell development	GO:0007191	122	19	13107	0.155738	1.80323	0.00903124	0.00903124
regulation of developmental process	GO:0097502	125	18	13107	0.144	1.66732	0.0244865	0.0244865
response to lipopolysaccharide	GO:1903367	128	18	13107	0.140625	1.62824	0.0369108	0.0369108
kidney development	GO:0032088	90	17	13107	0.188889	2.18707	0.0018213	0.0018213
response to hypoxia	GO:0033081	119	17	13107	0.142857	1.65409	0.0318258	0.0318258
catabolic process	GO:0007141	74	16	13107	0.216216	2.50349	0.000454206	0.000454206
lung development	GO:0032790	95	16	13107	0.168421	1.95008	0.00859037	0.00859037
negative regulation of cell growth	GO:0042308	100	16	13107	0.16	1.85258	0.0175544	0.0175544
response to lipid	GO:1903358	106	16	13107	0.150943	1.74772	0.0226544	0.0226544
thermosensory behavior	GO:2000024	57	15	13107	0.263158	3.04701	6.69179e-05	6.69179e-05
cellular response to endogenous stimulus	GO:0007516	73	15	13107	0.205479	2.37917	0.00118235	0.00118235
steroid metabolic process	GO:1905609	51	14	13107	0.27451	3.17845	7.07228e-05	7.07228e-05
regulation of membrane potential	GO:0120163	71	14	13107	0.197183	2.28311	0.00422219	0.00422219
cellular response to hormone stimulus	GO:0007603	79	14	13107	0.177215	2.05191	0.00774289	0.00774289
muscle organ development	GO:0035993	80	14	13107	0.175	2.02626	0.0084933	0.0084933
response to hydrogen peroxide	GO:1903226	80	14	13107	0.175	2.02626	0.0084933	0.0084933
regulation of response to external stimulus	GO:1901081	91	14	13107	0.153846	1.78133	0.0354522	0.0354522
cell adhesion	GO:0007162	94	14	13107	0.148936	1.72448	0.0395001	0.0395001
regulation of biological process	GO:0090308	96	14	13107	0.145833	1.68855	0.0431424	0.0431424
insecticide metabolic process	GO:0031125	31	13	13107	0.419355	4.85555	6.43442e-07	6.43442e-07
xenobiotic metabolic process	GO:2001242	45	13	13107	0.288889	3.34494	7.18195e-05	7.18195e-05
learning	GO:0032402	70	13	13107	0.185714	2.15032	0.00794179	0.00794179
response to insulin	GO:1903272	73	13	13107	0.178082	2.06195	0.0101384	0.0101384
regulation of macromolecule metabolic process	GO:0110096	82	13	13107	0.158537	1.83564	0.0274789	0.0274789
small molecule metabolic process	GO:1904887	83	13	13107	0.156627	1.81352	0.0291694	0.0291694
cellular response to tumor necrosis factor	GO:0009060	84	13	13107	0.154762	1.79193	0.0310346	0.0310346
negative regulation of cell migration	GO:0042310	86	13	13107	0.151163	1.75026	0.0493959	0.0493959
response to DDT	GO:1902679	35	12	13107	0.342857	3.96981	2.04027e-05	2.04027e-05
response to caffeine	GO:1902905	42	12	13107	0.285714	3.30818	0.000152651	0.000152651
negative regulation of osteoblast differentiation	GO:0045141	50	12	13107	0.24	2.77887	0.000875465	0.000875465
hormone metabolic process	GO:0030505	52	12	13107	0.230769	2.67199	0.00126618	0.00126618
cellular response to lipid	GO:0008050	60	12	13107	0.2	2.31572	0.00451109	0.00451109
positive regulation of neuroblast proliferation	GO:0061072	62	12	13107	0.193548	2.24102	0.00966296	0.00966296
regulation of blood pressure	GO:0090315	64	12	13107	0.1875	2.17099	0.0108043	0.0108043
developmental process involved in reproduction	GO:0010795	68	12	13107	0.176471	2.04329	0.0145716	0.0145716
cerebellum development	GO:0009266	72	12	13107	0.166667	1.92977	0.0309012	0.0309012
long-term synaptic potentiation	GO:0032774	79	12	13107	0.151899	1.75878	0.0434257	0.0434257
aggressive behavior	GO:0001659	28	11	13107	0.392857	4.54874	1.01503e-05	1.01503e-05
protein refolding	GO:0072070	33	11	13107	0.333333	3.85954	6.09086e-05	6.09086e-05
regulation of transport	GO:1902178	51	11	13107	0.215686	2.49735	0.00351971	0.00351971
outflow tract morphogenesis	GO:0048539	56	11	13107	0.196429	2.27437	0.00739283	0.00739283
lauric acid metabolic process	GO:0032368	25	10	13107	0.4	4.63145	2.14805e-05	2.14805e-05
lens development in camera-type eye	GO:0032435	34	10	13107	0.294118	3.40548	0.000417758	0.000417758
axon development	GO:0006525	47	10	13107	0.212766	2.46354	0.00586888	0.00586888
response to metal ion	GO:1903402	48	10	13107	0.208333	2.41221	0.00685126	0.00685126
male courtship behavior	GO:0033298	50	10	13107	0.2	2.31572	0.00919296	0.00919296
response to cadmium ion	GO:1902904	53	10	13107	0.188679	2.18465	0.0221807	0.0221807
regulation of synapse assembly	GO:1901733	55	10	13107	0.181818	2.1052	0.0246996	0.0246996
adult behavior	GO:0003309	56	10	13107	0.178571	2.06761	0.0263259	0.0263259
cellular lipid metabolic process	GO:0007376	57	10	13107	0.175439	2.03134	0.0282023	0.0282023
olfactory behavior	GO:0048210	59	10	13107	0.169492	1.96248	0.0327225	0.0327225
response to antibiotic	GO:1902848	27	9	13107	0.333333	3.85954	0.000286887	0.000286887
ATP metabolic process	GO:0000460	31	9	13107	0.290323	3.36154	0.000898589	0.000898589
negative regulation of reactive oxygen species metabolic process	GO:0045657	36	9	13107	0.25	2.89466	0.0028289	0.0028289
entrainment of circadian clock by photoperiod	GO:0015853	41	9	13107	0.219512	2.54165	0.00711558	0.00711558
branch fusion, open tracheal system	GO:0006772	47	9	13107	0.191489	2.21718	0.01736	0.01736
positive regulation of protein secretion	GO:0061883	48	9	13107	0.1875	2.17099	0.0197762	0.0197762
cortical actin cytoskeleton organization	GO:0010073	50	9	13107	0.18	2.08415	0.0363144	0.0363144
angiogenesis	GO:0001708	50	9	13107	0.18	2.08415	0.0363144	0.0363144
circadian regulation of gene expression	GO:0009758	52	9	13107	0.173077	2.00399	0.041063	0.041063
cellular response to epidermal growth factor stimulus	GO:0007518	54	9	13107	0.166667	1.92977	0.0472015	0.0472015
regulation of circadian sleep/wake cycle, sleep	GO:0097238	17	8	13107	0.470588	5.44876	3.59503e-05	3.59503e-05
response to unfolded protein	GO:1903784	33	8	13107	0.242424	2.80694	0.00586998	0.00586998
positive regulation of endothelial cell proliferation	GO:0060168	34	8	13107	0.235294	2.72438	0.00710529	0.00710529
white fat cell differentiation	GO:2001198	37	8	13107	0.216216	2.50349	0.0119917	0.0119917
eye photoreceptor cell development	GO:0018193	38	8	13107	0.210526	2.4376	0.014067	0.014067
calcium ion homeostasis	GO:0006893	39	8	13107	0.205128	2.3751	0.0163916	0.0163916
asymmetric neuroblast division	GO:0006401	40	8	13107	0.2	2.31572	0.0189803	0.0189803
fatty acid metabolic process	GO:0006109	40	8	13107	0.2	2.31572	0.0189803	0.0189803
negative regulation of neuroblast proliferation	GO:0044873	42	8	13107	0.190476	2.20545	0.0250072	0.0250072
negative regulation of amyloid fibril formation	GO:0039537	15	7	13107	0.466667	5.40336	0.000121263	0.000121263
cellular response to zinc ion starvation	GO:0009099	20	7	13107	0.35	4.05252	0.000991732	0.000991732
osteoblast development	GO:0048507	24	7	13107	0.291667	3.3771	0.00325566	0.00325566
cellular response to nitric oxide	GO:0008217	25	7	13107	0.28	3.24201	0.00418857	0.00418857
neuron fate determination	GO:0046597	25	7	13107	0.28	3.24201	0.00418857	0.00418857
positive regulation of synaptic transmission	GO:0070301	27	7	13107	0.259259	3.00186	0.00664231	0.00664231
negative regulation of axon extension involved in regeneration	GO:0040039	28	7	13107	0.25	2.89466	0.0082073	0.0082073
response to ecdysone	GO:1903014	28	7	13107	0.25	2.89466	0.0082073	0.0082073
positive regulation of cell-cell adhesion	GO:0051984	30	7	13107	0.233333	2.70168	0.0121239	0.0121239
positive regulation of amyloid-beta formation	GO:0051496	32	7	13107	0.21875	2.53282	0.0172318	0.0172318
telencephalon cell migration	GO:1990813	33	7	13107	0.212121	2.45607	0.0202831	0.0202831
cellular biosynthetic process	GO:0007320	35	7	13107	0.2	2.31572	0.0274716	0.0274716
positive regulation of sodium ion transport	GO:0070198	35	7	13107	0.2	2.31572	0.0274716	0.0274716
ventral midline development	GO:2000737	35	7	13107	0.2	2.31572	0.0274716	0.0274716
thermotaxis	GO:2000025	36	7	13107	0.194444	2.2514	0.0316411	0.0316411
embryonic development via the syncytial blastoderm	GO:0014736	37	7	13107	0.189189	2.19055	0.0362131	0.0362131
male courtship behavior, veined wing generated song production	GO:0033315	37	7	13107	0.189189	2.19055	0.0362131	0.0362131
negative regulation of synaptic transmission	GO:0045907	37	7	13107	0.189189	2.19055	0.0362131	0.0362131
regulation of egg-laying behavior	GO:0097711	37	7	13107	0.189189	2.19055	0.0362131	0.0362131
microtubule polymerization or depolymerization	GO:0035168	8	6	13107	0.75	8.68397	9.8435e-06	9.8435e-06
lipoprotein metabolic process	GO:0032703	11	6	13107	0.545455	6.31561	0.00012909	0.00012909
tubulin complex assembly	GO:2000424	13	6	13107	0.461538	5.34398	0.00041171	0.00041171
regulation of protein complex stability	GO:1900195	14	6	13107	0.428571	4.96227	0.000667787	0.000667787
cellular response to ammonium ion	GO:0007428	15	6	13107	0.4	4.63145	0.00103172	0.00103172
xenobiotic transmembrane transport	GO:2001243	15	6	13107	0.4	4.63145	0.00103172	0.00103172
apoptotic process involved in morphogenesis	GO:0006278	16	6	13107	0.375	4.34198	0.00153046	0.00153046
stress-activated MAPK cascade	GO:1905711	19	6	13107	0.315789	3.65641	0.00413635	0.00413635
secretion by cell	GO:1904338	20	6	13107	0.3	3.47359	0.00548199	0.00548199
regulation of chemotaxis	GO:0097168	21	6	13107	0.285714	3.30818	0.00712126	0.00712126
arachidonic acid metabolic process	GO:0006284	22	6	13107	0.272727	3.15781	0.00908705	0.00908705
monocarboxylic acid metabolic process	GO:0035774	22	6	13107	0.272727	3.15781	0.00908705	0.00908705
cold acclimation	GO:0009895	24	6	13107	0.25	2.89466	0.014125	0.014125
regulation of synaptic transmission, glutamatergic	GO:1901836	25	6	13107	0.24	2.77887	0.0172568	0.0172568
optic nerve development	GO:0048364	26	6	13107	0.230769	2.67199	0.0208337	0.0208337
positive regulation of transmission of nerve impulse	GO:0070543	26	6	13107	0.230769	2.67199	0.0208337	0.0208337
behavioral fear response	GO:0001843	27	6	13107	0.222222	2.57303	0.0248801	0.0248801
hair follicle morphogenesis	GO:0030030	28	6	13107	0.214286	2.48113	0.0294175	0.0294175
recognition of apoptotic cell	GO:0080021	28	6	13107	0.214286	2.48113	0.0294175	0.0294175
blood vessel morphogenesis	GO:0006700	30	6	13107	0.2	2.31572	0.0400371	0.0400371
protein localization to synapse	GO:0071985	30	6	13107	0.2	2.31572	0.0400371	0.0400371
regulation of translational initiation	GO:1902164	30	6	13107	0.2	2.31572	0.0400371	0.0400371
transforming growth factor beta receptor signaling pathway	GO:2000243	31	6	13107	0.193548	2.24102	0.0461471	0.0461471
response to camptothecin	GO:1902915	7	5	13107	0.714286	8.27044	8.62124e-05	8.62124e-05
phosphatidylglycerol metabolic process	GO:0048919	9	5	13107	0.555556	6.43257	0.000445839	0.000445839
regulation of high-density lipoprotein particle assembly	GO:0099178	9	5	13107	0.555556	6.43257	0.000445839	0.000445839
alcohol metabolic process	GO:0003342	11	5	13107	0.454545	5.26301	0.00141003	0.00141003
regulation of hormone metabolic process	GO:0099504	11	5	13107	0.454545	5.26301	0.00141003	0.00141003
regulation of phospholipid metabolic process	GO:1900020	11	5	13107	0.454545	5.26301	0.00141003	0.00141003
response to gonadotropin	GO:1903142	12	5	13107	0.416667	4.82443	0.00224555	0.00224555
synaptic vesicle cycle	GO:1990267	12	5	13107	0.416667	4.82443	0.00224555	0.00224555
surfactant homeostasis	GO:1905923	13	5	13107	0.384615	4.45332	0.00339057	0.00339057
adaptive immune response	GO:0003213	15	5	13107	0.333333	3.85954	0.00683434	0.00683434
epithelial to mesenchymal transition involved in endocardial cushion formation	GO:0016063	15	5	13107	0.333333	3.85954	0.00683434	0.00683434
regulation of AMPA receptor activity	GO:0080141	15	5	13107	0.333333	3.85954	0.00683434	0.00683434
regulation of protein localization to cell surface	GO:1900248	15	5	13107	0.333333	3.85954	0.00683434	0.00683434
axon extension involved in axon guidance	GO:0006531	16	5	13107	0.3125	3.61832	0.00924225	0.00924225
glutamate receptor signaling pathway	GO:0021836	17	5	13107	0.294118	3.40548	0.0121755	0.0121755
inhibition of non-skeletal tissue mineralization	GO:0030961	17	5	13107	0.294118	3.40548	0.0121755	0.0121755
long-chain fatty-acyl-CoA metabolic process	GO:0032760	17	5	13107	0.294118	3.40548	0.0121755	0.0121755
intracellular signaling cassette	GO:0031547	18	5	13107	0.277778	3.21628	0.0156801	0.0156801
intraciliary transport	GO:0031585	18	5	13107	0.277778	3.21628	0.0156801	0.0156801
binding of sperm to zona pellucida	GO:0006642	19	5	13107	0.263158	3.04701	0.0197969	0.0197969
septate junction assembly	GO:1904547	19	5	13107	0.263158	3.04701	0.0197969	0.0197969
behavior	GO:0001841	19	5	13107	0.263158	3.04701	0.0197969	0.0197969
xenobiotic metabolic process	GO:2000270	19	5	13107	0.263158	3.04701	0.0197969	0.0197969
phosphate ion homeostasis	GO:0048867	20	5	13107	0.25	2.89466	0.0245612	0.0245612
response to amine	GO:1902808	20	5	13107	0.25	2.89466	0.0245612	0.0245612
axonogenesis involved in innervation	GO:0006551	21	5	13107	0.238095	2.75681	0.0300025	0.0300025
cell communication	GO:0007172	21	5	13107	0.238095	2.75681	0.0300025	0.0300025
monoatomic cation homeostasis	GO:0035739	21	5	13107	0.238095	2.75681	0.0300025	0.0300025
neurotransmitter transport	GO:0046670	21	5	13107	0.238095	2.75681	0.0300025	0.0300025
regulation of stem cell population maintenance	GO:1901652	21	5	13107	0.238095	2.75681	0.0300025	0.0300025
maternal-to-zygotic transition of gene expression	GO:0033700	22	5	13107	0.227273	2.6315	0.0361438	0.0361438
axoneme assembly	GO:0006548	23	5	13107	0.217391	2.51709	0.0430019	0.0430019
carbohydrate derivative metabolic process	GO:0006958	23	5	13107	0.217391	2.51709	0.0430019	0.0430019
cellular catabolic process	GO:0007338	23	5	13107	0.217391	2.51709	0.0430019	0.0430019
cellular oxidant detoxification	GO:0007384	23	5	13107	0.217391	2.51709	0.0430019	0.0430019
dendrite regeneration	GO:0010544	23	5	13107	0.217391	2.51709	0.0430019	0.0430019
mRNA destabilization	GO:0032957	23	5	13107	0.217391	2.51709	0.0430019	0.0430019
positive regulation of fibroblast migration	GO:0060291	23	5	13107	0.217391	2.51709	0.0430019	0.0430019
response to insecticide	GO:1903265	23	5	13107	0.217391	2.51709	0.0430019	0.0430019
negative regulation of low-density lipoprotein receptor activity	GO:0043605	5	4	13107	0.8	9.2629	0.000257702	0.000257702
negative regulation of receptor-mediated endocytosis involved in cholesterol transport	GO:0045668	5	4	13107	0.8	9.2629	0.000257702	0.000257702
negative regulation of steroid metabolic process	GO:0045860	5	4	13107	0.8	9.2629	0.000257702	0.000257702
positive regulation of phospholipid efflux	GO:0061436	5	4	13107	0.8	9.2629	0.000257702	0.000257702
positive regulation of protein homooligomerization	GO:0061725	5	4	13107	0.8	9.2629	0.000257702	0.000257702
regulation of phosphatidylcholine metabolic process	GO:0180027	5	4	13107	0.8	9.2629	0.000257702	0.000257702
ceramide translocation	GO:0009202	6	4	13107	0.666667	7.71908	0.000719815	0.000719815
heat shock-mediated polytene chromosome puffing	GO:0030154	6	4	13107	0.666667	7.71908	0.000719815	0.000719815
mating plug formation	GO:0033986	6	4	13107	0.666667	7.71908	0.000719815	0.000719815
negative regulation of cholesterol efflux	GO:0042464	6	4	13107	0.666667	7.71908	0.000719815	0.000719815
negative regulation of intracellular transport	GO:0043473	6	4	13107	0.666667	7.71908	0.000719815	0.000719815
negative regulation of oskar mRNA translation	GO:0045137	6	4	13107	0.666667	7.71908	0.000719815	0.000719815
negative regulation of sphingolipid biosynthetic process	GO:0045841	6	4	13107	0.666667	7.71908	0.000719815	0.000719815
metamorphosis	GO:0006816	6	4	13107	0.666667	7.71908	0.000719815	0.000719815
homocysteine metabolic process	GO:0030449	7	4	13107	0.571429	6.61636	0.00156417	0.00156417
neurotransmitter-gated ion channel clustering	GO:0046672	7	4	13107	0.571429	6.61636	0.00156417	0.00156417
postsynaptic membrane organization	GO:0010498	7	4	13107	0.571429	6.61636	0.00156417	0.00156417
import into cell	GO:0030859	8	4	13107	0.5	5.78931	0.00291409	0.00291409
negative regulation of phospholipid biosynthetic process	GO:0045329	8	4	13107	0.5	5.78931	0.00291409	0.00291409
positive regulation of triglyceride catabolic process	GO:0070563	8	4	13107	0.5	5.78931	0.00291409	0.00291409
G protein-coupled receptor signaling pathway, coupled to cyclic nucleotide second messenger	GO:0001828	9	4	13107	0.444444	5.14605	0.00488734	0.00488734
brush border assembly	GO:0006821	9	4	13107	0.444444	5.14605	0.00488734	0.00488734
positive regulation of microtubule nucleation	GO:0060903	9	4	13107	0.444444	5.14605	0.00488734	0.00488734
response to pyrethroid	GO:1903599	9	4	13107	0.444444	5.14605	0.00488734	0.00488734
superoxide metabolic process	GO:1905911	9	4	13107	0.444444	5.14605	0.00488734	0.00488734
central nervous system myelin formation	GO:0009128	10	4	13107	0.4	4.63145	0.00759147	0.00759147
xenobiotic export from cell	GO:2001241	10	4	13107	0.4	4.63145	0.00759147	0.00759147
G protein-coupled chemorepellent receptor signaling pathway	GO:0001817	12	4	13107	0.333333	3.85954	0.0155543	0.0155543
diaphragm development	GO:0010811	12	4	13107	0.333333	3.85954	0.0155543	0.0155543
floor plate formation	GO:0019417	12	4	13107	0.333333	3.85954	0.0155543	0.0155543
retinal cone cell development	GO:1903896	12	4	13107	0.333333	3.85954	0.0155543	0.0155543
righting reflex	GO:1904153	12	4	13107	0.333333	3.85954	0.0155543	0.0155543
xenobiotic detoxification by transmembrane export across the plasma membrane	GO:2001240	12	4	13107	0.333333	3.85954	0.0155543	0.0155543
circadian temperature homeostasis	GO:0009792	13	4	13107	0.307692	3.56265	0.0209551	0.0209551
filamentous growth of a population of unicellular organisms in response to biotic stimulus	GO:0019344	13	4	13107	0.307692	3.56265	0.0209551	0.0209551
membrane depolarization during SA node cell action potential	GO:0034352	13	4	13107	0.307692	3.56265	0.0209551	0.0209551
positive regulation of endothelial cell chemotaxis	GO:0060161	13	4	13107	0.307692	3.56265	0.0209551	0.0209551
regulation of proteasomal protein catabolic process	GO:1900163	13	4	13107	0.307692	3.56265	0.0209551	0.0209551
response to light intensity	GO:1903354	13	4	13107	0.307692	3.56265	0.0209551	0.0209551
transepithelial transport	GO:2000234	13	4	13107	0.307692	3.56265	0.0209551	0.0209551
compound eye photoreceptor fate commitment	GO:0009969	14	4	13107	0.285714	3.30818	0.0273696	0.0273696
posterior lateral line neuromast primordium migration	GO:0071035	14	4	13107	0.285714	3.30818	0.0273696	0.0273696
protein homotrimerization	GO:0071599	14	4	13107	0.285714	3.30818	0.0273696	0.0273696
regulation of cholesterol metabolic process	GO:0097187	14	4	13107	0.285714	3.30818	0.0273696	0.0273696
left/right pattern formation	GO:0032417	15	4	13107	0.266667	3.08763	0.0348284	0.0348284
regulation of glucose metabolic process	GO:0098976	15	4	13107	0.266667	3.08763	0.0348284	0.0348284
regulation of potassium ion transmembrane transport	GO:1900108	15	4	13107	0.266667	3.08763	0.0348284	0.0348284
response to fibroblast growth factor	GO:1903054	15	4	13107	0.266667	3.08763	0.0348284	0.0348284
endochondral ossification	GO:0005980	15	4	13107	0.266667	3.08763	0.0348284	0.0348284
chaperone-mediated protein complex assembly	GO:0009411	16	4	13107	0.25	2.89466	0.0433468	0.0433468
endocrine pancreas development	GO:0015670	16	4	13107	0.25	2.89466	0.0433468	0.0433468
modulation of excitatory postsynaptic potential	GO:0035710	16	4	13107	0.25	2.89466	0.0433468	0.0433468
negative regulation of meiotic cell cycle	GO:0044090	16	4	13107	0.25	2.89466	0.0433468	0.0433468
phospholipid homeostasis	GO:0050685	16	4	13107	0.25	2.89466	0.0433468	0.0433468
positive regulation of cardiac muscle contraction	GO:0051881	16	4	13107	0.25	2.89466	0.0433468	0.0433468
pulmonary valve morphogenesis	GO:0072274	16	4	13107	0.25	2.89466	0.0433468	0.0433468
regulation of tubulin deacetylation	GO:1902206	16	4	13107	0.25	2.89466	0.0433468	0.0433468
carbohydrate transmembrane transport	GO:0006970	3	3	13107	1	11.5786	0.000642654	0.000642654
multivesicular body fusion to apical plasma membrane	GO:0035928	3	3	13107	1	11.5786	0.000642654	0.000642654
phospholipase C-activating serotonin receptor signaling pathway	GO:0050672	3	3	13107	1	11.5786	0.000642654	0.000642654
positive regulation of cytotoxic T cell differentiation	GO:0060044	4	3	13107	0.75	8.68397	0.00240397	0.00240397
postsynaptic density organization	GO:0071073	4	3	13107	0.75	8.68397	0.00240397	0.00240397
regulation of atrial cardiac muscle cell membrane depolarization	GO:0090261	4	3	13107	0.75	8.68397	0.00240397	0.00240397
synaptic vesicle localization	GO:1990386	4	3	13107	0.75	8.68397	0.00240397	0.00240397
lymphocyte homeostasis	GO:0006637	4	3	13107	0.75	8.68397	0.00240397	0.00240397
antigen processing and presentation of peptide antigen	GO:0006210	5	3	13107	0.6	6.94717	0.00562214	0.00562214
cardiac vascular smooth muscle cell development	GO:0007077	5	3	13107	0.6	6.94717	0.00562214	0.00562214
excitatory synapse assembly	GO:0017055	5	3	13107	0.6	6.94717	0.00562214	0.00562214
ganglion mother cell fate determination	GO:0021546	5	3	13107	0.6	6.94717	0.00562214	0.00562214
leukocyte apoptotic process	GO:0032467	5	3	13107	0.6	6.94717	0.00562214	0.00562214
negative regulation of sequestering of triglyceride	GO:0045778	5	3	13107	0.6	6.94717	0.00562214	0.00562214
positive regulation of amyloid precursor protein catabolic process	GO:0051494	5	3	13107	0.6	6.94717	0.00562214	0.00562214
positive regulation of protein polymerization	GO:0061864	5	3	13107	0.6	6.94717	0.00562214	0.00562214
regulation of ecdysteroid metabolic process	GO:0097688	5	3	13107	0.6	6.94717	0.00562214	0.00562214
regulation of glycoprotein biosynthetic process	GO:0099050	5	3	13107	0.6	6.94717	0.00562214	0.00562214
anterior head segmentation	GO:0006108	6	3	13107	0.5	5.78931	0.0105222	0.0105222
chaperone-mediated autophagy	GO:0009409	6	3	13107	0.5	5.78931	0.0105222	0.0105222
glutamate secretion, neurotransmission	GO:0021846	6	3	13107	0.5	5.78931	0.0105222	0.0105222
negative regulation of lymphocyte proliferation	GO:0043652	6	3	13107	0.5	5.78931	0.0105222	0.0105222
pole plasm mRNA localization	GO:0050962	6	3	13107	0.5	5.78931	0.0105222	0.0105222
regulation of cellular response to drug	GO:0097094	6	3	13107	0.5	5.78931	0.0105222	0.0105222
regulation of norepinephrine secretion	GO:0141193	6	3	13107	0.5	5.78931	0.0105222	0.0105222
response to nitrosative stress	GO:1903501	6	3	13107	0.5	5.78931	0.0105222	0.0105222
neurotransmitter transport	GO:0007295	6	3	13107	0.5	5.78931	0.0105222	0.0105222
apoptotic process involved in development	GO:0006272	7	3	13107	0.428571	4.96227	0.0172372	0.0172372
cardiac conduction	GO:0007015	7	3	13107	0.428571	4.96227	0.0172372	0.0172372
cardiac muscle cell apoptotic process	GO:0007029	7	3	13107	0.428571	4.96227	0.0172372	0.0172372
establishment or maintenance of cytoskeleton polarity involved in gastrulation	GO:0016545	7	3	13107	0.428571	4.96227	0.0172372	0.0172372
membrane bending	GO:0034334	7	3	13107	0.428571	4.96227	0.0172372	0.0172372
positive regulation of vitellogenesis	GO:0070875	7	3	13107	0.428571	4.96227	0.0172372	0.0172372
postsynaptic specialization assembly	GO:0071168	7	3	13107	0.428571	4.96227	0.0172372	0.0172372
sensory perception of light stimulus	GO:1904506	7	3	13107	0.428571	4.96227	0.0172372	0.0172372
serotonin receptor signaling pathway	GO:1904639	7	3	13107	0.428571	4.96227	0.0172372	0.0172372
telomerase holoenzyme complex assembly	GO:1990830	7	3	13107	0.428571	4.96227	0.0172372	0.0172372
zinc ion transmembrane transport	GO:2001295	7	3	13107	0.428571	4.96227	0.0172372	0.0172372
circadian rhythm	GO:0002548	7	3	13107	0.428571	4.96227	0.0172372	0.0172372
organic acid metabolic process	GO:0007519	7	3	13107	0.428571	4.96227	0.0172372	0.0172372
phosphatidic acid biosynthetic process	GO:0008218	7	3	13107	0.428571	4.96227	0.0172372	0.0172372
urea cycle	GO:0101030	7	3	13107	0.428571	4.96227	0.0172372	0.0172372
detection of carbon dioxide	GO:0010628	8	3	13107	0.375	4.34198	0.0258258	0.0258258
dopamine biosynthetic process from tyrosine	GO:0010888	8	3	13107	0.375	4.34198	0.0258258	0.0258258
glutathione biosynthetic process	GO:0021855	8	3	13107	0.375	4.34198	0.0258258	0.0258258
hepatocyte proliferation	GO:0030258	8	3	13107	0.375	4.34198	0.0258258	0.0258258
isoquinoline alkaloid metabolic process	GO:0032006	8	3	13107	0.375	4.34198	0.0258258	0.0258258
long-chain fatty acid import across plasma membrane	GO:0032747	8	3	13107	0.375	4.34198	0.0258258	0.0258258
mesectoderm development	GO:0034498	8	3	13107	0.375	4.34198	0.0258258	0.0258258
negative regulation of biomineral tissue development	GO:0042049	8	3	13107	0.375	4.34198	0.0258258	0.0258258
opsin transport	GO:0048343	8	3	13107	0.375	4.34198	0.0258258	0.0258258
peptide hormone processing	GO:0048675	8	3	13107	0.375	4.34198	0.0258258	0.0258258
phytoalexin metabolic process	GO:0050787	8	3	13107	0.375	4.34198	0.0258258	0.0258258
positive regulation of T cell mediated cytotoxicity	GO:0051305	8	3	13107	0.375	4.34198	0.0258258	0.0258258
positive regulation of intracellular estrogen receptor signaling pathway	GO:0060544	8	3	13107	0.375	4.34198	0.0258258	0.0258258
positive regulation of neutrophil migration	GO:0061115	8	3	13107	0.375	4.34198	0.0258258	0.0258258
protein insertion into mitochondrial outer membrane	GO:0071651	8	3	13107	0.375	4.34198	0.0258258	0.0258258
regulation of nematode larval development, heterochronic	GO:0140651	8	3	13107	0.375	4.34198	0.0258258	0.0258258
retinal rod cell differentiation	GO:1903919	8	3	13107	0.375	4.34198	0.0258258	0.0258258
telomere maintenance via telomerase	GO:1990859	8	3	13107	0.375	4.34198	0.0258258	0.0258258
mating	GO:0006723	8	3	13107	0.375	4.34198	0.0258258	0.0258258
startle response	GO:0045104	8	3	13107	0.375	4.34198	0.0258258	0.0258258
L-phenylalanine catabolic process	GO:0002067	9	3	13107	0.333333	3.85954	0.0362878	0.0362878
cellular response to ionomycin	GO:0007631	9	3	13107	0.333333	3.85954	0.0362878	0.0362878
cerebellar granule cell precursor proliferation	GO:0009258	9	3	13107	0.333333	3.85954	0.0362878	0.0362878
membrane depolarization during AV node cell action potential	GO:0034349	9	3	13107	0.333333	3.85954	0.0362878	0.0362878
myeloid progenitor cell differentiation	GO:0036093	9	3	13107	0.333333	3.85954	0.0362878	0.0362878
negative regulation of DNA biosynthetic process	GO:0036343	9	3	13107	0.333333	3.85954	0.0362878	0.0362878
negative regulation of thymocyte apoptotic process	GO:0045950	9	3	13107	0.333333	3.85954	0.0362878	0.0362878
octopamine biosynthetic process	GO:0048167	9	3	13107	0.333333	3.85954	0.0362878	0.0362878
pigment cell differentiation	GO:0050804	9	3	13107	0.333333	3.85954	0.0362878	0.0362878
positive regulation of nervous system development	GO:0061062	9	3	13107	0.333333	3.85954	0.0362878	0.0362878
posterior head segmentation	GO:0071025	9	3	13107	0.333333	3.85954	0.0362878	0.0362878
protein kinase C-activating G protein-coupled receptor signaling pathway	GO:0071672	9	3	13107	0.333333	3.85954	0.0362878	0.0362878
regulation of aerobic respiration	GO:0090162	9	3	13107	0.333333	3.85954	0.0362878	0.0362878
retinal cone cell differentiation	GO:1903898	9	3	13107	0.333333	3.85954	0.0362878	0.0362878
serotonin biosynthetic process from tryptophan	GO:1904635	9	3	13107	0.333333	3.85954	0.0362878	0.0362878
insect visual primordium development	GO:0006507	9	3	13107	0.333333	3.85954	0.0362878	0.0362878
G protein-coupled acetylcholine receptor signaling pathway	GO:0001783	10	3	13107	0.3	3.47359	0.0485769	0.0485769
cell migration involved in endocardial cushion formation	GO:0007223	10	3	13107	0.3	3.47359	0.0485769	0.0485769
futile creatine cycle	GO:0021515	10	3	13107	0.3	3.47359	0.0485769	0.0485769
positive regulation of prostaglandin biosynthetic process	GO:0061624	10	3	13107	0.3	3.47359	0.0485769	0.0485769
pyridoxal phosphate metabolic process	GO:0072523	10	3	13107	0.3	3.47359	0.0485769	0.0485769
regulation of long-term synaptic potentiation	GO:0110027	10	3	13107	0.3	3.47359	0.0485769	0.0485769
regulation of myosin II filament organization	GO:0140588	10	3	13107	0.3	3.47359	0.0485769	0.0485769
regulation of triglyceride metabolic process	GO:1902183	10	3	13107	0.3	3.47359	0.0485769	0.0485769
response to macrophage colony-stimulating factor	GO:1903378	10	3	13107	0.3	3.47359	0.0485769	0.0485769
response to vitamin B6	GO:1903818	10	3	13107	0.3	3.47359	0.0485769	0.0485769
skeletal muscle contraction	GO:1904800	10	3	13107	0.3	3.47359	0.0485769	0.0485769
telomere organization	GO:1990867	10	3	13107	0.3	3.47359	0.0485769	0.0485769
tissue remodeling	GO:2000116	10	3	13107	0.3	3.47359	0.0485769	0.0485769
ceramide phosphoethanolamine biosynthetic process	GO:0009201	2	2	13107	1	11.5786	0.00745308	0.00745308
endocardial cushion to mesenchymal transition involved in heart valve formation	GO:0014912	2	2	13107	1	11.5786	0.00745308	0.00745308
establishment of epithelial cell apical/basal polarity involved in camera-type eye morphogenesis	GO:0016204	2	2	13107	1	11.5786	0.00745308	0.00745308
ganglioside metabolic process	GO:0021549	2	2	13107	1	11.5786	0.00745308	0.00745308
negative regulation of T cell mediated immunity	GO:0038113	2	2	13107	1	11.5786	0.00745308	0.00745308
negative regulation of mRNA 3'-end processing	GO:0043686	2	2	13107	1	11.5786	0.00745308	0.00745308
negative regulation of non-membrane spanning protein tyrosine kinase activity	GO:0045056	2	2	13107	1	11.5786	0.00745308	0.00745308
negative regulation of vasculature development involved in avascular cornea development in camera-type eye	GO:0046166	2	2	13107	1	11.5786	0.00745308	0.00745308
nicotine biosynthetic process	GO:0046716	2	2	13107	1	11.5786	0.00745308	0.00745308
positive regulation of cysteine-type endopeptidase activity involved in apoptotic signaling pathway	GO:0060027	2	2	13107	1	11.5786	0.00745308	0.00745308
positive regulation of respiratory gaseous exchange	GO:0062111	2	2	13107	1	11.5786	0.00745308	0.00745308
positive regulation of synaptic vesicle priming	GO:0070316	2	2	13107	1	11.5786	0.00745308	0.00745308
positive regulation of transdifferentiation	GO:0070487	2	2	13107	1	11.5786	0.00745308	0.00745308
regulation of ceramide biosynthetic process	GO:0097152	2	2	13107	1	11.5786	0.00745308	0.00745308
regulation of protein localization to cell periphery	GO:1900246	2	2	13107	1	11.5786	0.00745308	0.00745308
regulation of vasculogenesis	GO:1902283	2	2	13107	1	11.5786	0.00745308	0.00745308
renal vesicle development	GO:1902523	2	2	13107	1	11.5786	0.00745308	0.00745308
sneeze reflex	GO:1904980	2	2	13107	1	11.5786	0.00745308	0.00745308
specification of proximal tubule identity	GO:1905225	2	2	13107	1	11.5786	0.00745308	0.00745308
sphingolipid translocation	GO:1905362	2	2	13107	1	11.5786	0.00745308	0.00745308
umbilical cord morphogenesis	GO:2000553	2	2	13107	1	11.5786	0.00745308	0.00745308
acetylcholine catabolic process in synaptic cleft	GO:0001508	2	2	13107	1	11.5786	0.00745308	0.00745308
brainstem development	GO:0001937	2	2	13107	1	11.5786	0.00745308	0.00745308
cell projection organization	GO:0002087	2	2	13107	1	11.5786	0.00745308	0.00745308
proton transmembrane transport	GO:0016070	2	2	13107	1	11.5786	0.00745308	0.00745308
L-aspartate import across plasma membrane	GO:0001997	3	2	13107	0.666667	7.71908	0.0210708	0.0210708
anterior neural plate formation	GO:0006112	3	2	13107	0.666667	7.71908	0.0210708	0.0210708
arsenite transport	GO:0006311	3	2	13107	0.666667	7.71908	0.0210708	0.0210708
artery smooth muscle contraction	GO:0006337	3	2	13107	0.666667	7.71908	0.0210708	0.0210708
asymmetric neuroblast division resulting in ganglion mother cell formation	GO:0006402	3	2	13107	0.666667	7.71908	0.0210708	0.0210708
axon ensheathment in central nervous system	GO:0006527	3	2	13107	0.666667	7.71908	0.0210708	0.0210708
cellular response to bisphenol A	GO:0007444	3	2	13107	0.666667	7.71908	0.0210708	0.0210708
cellular response to oxidised low-density lipoprotein particle stimulus	GO:0008299	3	2	13107	0.666667	7.71908	0.0210708	0.0210708
cysteine transmembrane transport	GO:0010199	3	2	13107	0.666667	7.71908	0.0210708	0.0210708
epigenetic programing of male pronucleus	GO:0015914	3	2	13107	0.666667	7.71908	0.0210708	0.0210708
glutathione transmembrane import into vacuole	GO:0021870	3	2	13107	0.666667	7.71908	0.0210708	0.0210708
maintenance of imaginal histoblast diploidy	GO:0033140	3	2	13107	0.666667	7.71908	0.0210708	0.0210708
mammary gland morphogenesis	GO:0033595	3	2	13107	0.666667	7.71908	0.0210708	0.0210708
microglial cell activation	GO:0035138	3	2	13107	0.666667	7.71908	0.0210708	0.0210708
negative regulation of cartilage development	GO:0042219	3	2	13107	0.666667	7.71908	0.0210708	0.0210708
negative regulation of leukocyte chemotaxis	GO:0043547	3	2	13107	0.666667	7.71908	0.0210708	0.0210708
negative regulation of microglial cell activation	GO:0044321	3	2	13107	0.666667	7.71908	0.0210708	0.0210708
oxygen metabolic process	GO:0048584	3	2	13107	0.666667	7.71908	0.0210708	0.0210708
platelet degranulation	GO:0050908	3	2	13107	0.666667	7.71908	0.0210708	0.0210708
positive regulation of osteoclast proliferation	GO:0061321	3	2	13107	0.666667	7.71908	0.0210708	0.0210708
regulation of anaphase-promoting complex-dependent catabolic process	GO:0090191	3	2	13107	0.666667	7.71908	0.0210708	0.0210708
regulation of insulin-like growth factor receptor signaling pathway	GO:0099576	3	2	13107	0.666667	7.71908	0.0210708	0.0210708
regulation of mitochondrial mRNA stability	GO:0140066	3	2	13107	0.666667	7.71908	0.0210708	0.0210708
regulation of presynapse organization	GO:1900120	3	2	13107	0.666667	7.71908	0.0210708	0.0210708
regulation of protein targeting to membrane	GO:1900454	3	2	13107	0.666667	7.71908	0.0210708	0.0210708
regulation of smooth muscle tissue development	GO:1901525	3	2	13107	0.666667	7.71908	0.0210708	0.0210708
regulation of trans-synaptic signaling by endocannabinoid, modulating synaptic transmission	GO:1902041	3	2	13107	0.666667	7.71908	0.0210708	0.0210708
response to N-phenylthiourea	GO:1902725	3	2	13107	0.666667	7.71908	0.0210708	0.0210708
response to decreased oxygen levels	GO:1902993	3	2	13107	0.666667	7.71908	0.0210708	0.0210708
sphingomyelin metabolic process	GO:1905367	3	2	13107	0.666667	7.71908	0.0210708	0.0210708
sterol homeostasis	GO:1905613	3	2	13107	0.666667	7.71908	0.0210708	0.0210708
telomere maintenance in response to DNA damage	GO:1990834	3	2	13107	0.666667	7.71908	0.0210708	0.0210708
intramembranous ossification	GO:0006551	3	2	13107	0.666667	7.71908	0.0210708	0.0210708
regulatory ncRNA-mediated gene silencing	GO:0032056	3	2	13107	0.666667	7.71908	0.0210708	0.0210708
GMP biosynthetic process	GO:0001878	4	2	13107	0.5	5.78931	0.0397319	0.0397319
Notch signaling pathway involved in arterial endothelial cell fate commitment	GO:0002276	4	2	13107	0.5	5.78931	0.0397319	0.0397319
RNA modification	GO:0002457	4	2	13107	0.5	5.78931	0.0397319	0.0397319
arterial endothelial cell differentiation	GO:0006312	4	2	13107	0.5	5.78931	0.0397319	0.0397319
cellular response to mercury ion	GO:0008089	4	2	13107	0.5	5.78931	0.0397319	0.0397319
chaperone-mediated autophagy translocation complex disassembly	GO:0009410	4	2	13107	0.5	5.78931	0.0397319	0.0397319
cytoskeletal matrix organization at active zone	GO:0010305	4	2	13107	0.5	5.78931	0.0397319	0.0397319
glomerular capillary formation	GO:0021747	4	2	13107	0.5	5.78931	0.0397319	0.0397319
inner cell mass cell differentiation	GO:0031018	4	2	13107	0.5	5.78931	0.0397319	0.0397319
lactam catabolic process	GO:0032186	4	2	13107	0.5	5.78931	0.0397319	0.0397319
lateral semicircular canal development	GO:0032355	4	2	13107	0.5	5.78931	0.0397319	0.0397319
leukotriene D4 catabolic process	GO:0032488	4	2	13107	0.5	5.78931	0.0397319	0.0397319
lipid phosphorylation	GO:0032648	4	2	13107	0.5	5.78931	0.0397319	0.0397319
mitochondrial large ribosomal subunit assembly	GO:0035281	4	2	13107	0.5	5.78931	0.0397319	0.0397319
myosin II filament assembly	GO:0036150	4	2	13107	0.5	5.78931	0.0397319	0.0397319
negative regulation of L-leucine import across plasma membrane	GO:0036514	4	2	13107	0.5	5.78931	0.0397319	0.0397319
negative regulation of cysteine-type endopeptidase activity involved in execution phase of apoptosis	GO:0042628	4	2	13107	0.5	5.78931	0.0397319	0.0397319
negative regulation of neuronal action potential	GO:0045019	4	2	13107	0.5	5.78931	0.0397319	0.0397319
negative regulation of transcription initiation by RNA polymerase II	GO:0045992	4	2	13107	0.5	5.78931	0.0397319	0.0397319
negative regulation of uracil import across plasma membrane	GO:0046107	4	2	13107	0.5	5.78931	0.0397319	0.0397319
neuroligin clustering involved in postsynaptic membrane assembly	GO:0046533	4	2	13107	0.5	5.78931	0.0397319	0.0397319
nose morphogenesis	GO:0046849	4	2	13107	0.5	5.78931	0.0397319	0.0397319
observational learning	GO:0048143	4	2	13107	0.5	5.78931	0.0397319	0.0397319
octopamine signaling pathway	GO:0048170	4	2	13107	0.5	5.78931	0.0397319	0.0397319
phosphatidylethanolamine acyl-chain remodeling	GO:0048884	4	2	13107	0.5	5.78931	0.0397319	0.0397319
positive regulation of behavioral fear response	GO:0051653	4	2	13107	0.5	5.78931	0.0397319	0.0397319
positive regulation of hydrogen sulfide biosynthetic process	GO:0060457	4	2	13107	0.5	5.78931	0.0397319	0.0397319
positive regulation of inhibitory postsynaptic potential	GO:0060482	4	2	13107	0.5	5.78931	0.0397319	0.0397319
positive regulation of lysosomal membrane permeability	GO:0060709	4	2	13107	0.5	5.78931	0.0397319	0.0397319
positive regulation of protein refolding	GO:0061875	4	2	13107	0.5	5.78931	0.0397319	0.0397319
presynaptic membrane organization	GO:0071259	4	2	13107	0.5	5.78931	0.0397319	0.0397319
protein localization to cell-cell junction	GO:0071763	4	2	13107	0.5	5.78931	0.0397319	0.0397319
protein localization to motile cilium	GO:0071880	4	2	13107	0.5	5.78931	0.0397319	0.0397319
protein targeting to lysosome involved in chaperone-mediated autophagy	GO:0072105	4	2	13107	0.5	5.78931	0.0397319	0.0397319
regulation of gamma-delta T cell differentiation	GO:0098924	4	2	13107	0.5	5.78931	0.0397319	0.0397319
regulation of inner ear auditory receptor cell differentiation	GO:0099555	4	2	13107	0.5	5.78931	0.0397319	0.0397319
regulation of macropinocytosis	GO:0110136	4	2	13107	0.5	5.78931	0.0397319	0.0397319
response to cortisol	GO:1902975	4	2	13107	0.5	5.78931	0.0397319	0.0397319
response to hydroperoxide	GO:1903232	4	2	13107	0.5	5.78931	0.0397319	0.0397319
response to peptide	GO:1903545	4	2	13107	0.5	5.78931	0.0397319	0.0397319
short-chain fatty acid transmembrane transport	GO:1904693	4	2	13107	0.5	5.78931	0.0397319	0.0397319
slow axonal transport	GO:1904876	4	2	13107	0.5	5.78931	0.0397319	0.0397319
spontaneous neurotransmitter secretion	GO:1905517	4	2	13107	0.5	5.78931	0.0397319	0.0397319
synaptonemal complex disassembly	GO:1990426	4	2	13107	0.5	5.78931	0.0397319	0.0397319
antibacterial humoral response	GO:0001736	4	2	13107	0.5	5.78931	0.0397319	0.0397319

## Sheet: MF_RSC_up
Table S2.5. Enriched molecular functions Identified by GO Term Analysis from upregulated genes in RSC comparisons
MF_GO_terms	MF_GO_ID	total_genes_in_GO	Cands_in_GO	total_genes_in_background	GeneRatio	fold_enrichment	p_value	adj_p_value
RNA polymerase II cis-regulatory region sequence-specific DNA binding	GO:0000978	394	47	13107	0.119289	1.38121	0.0161301	0.0161301
unfolded protein binding	GO:0051082	88	16	13107	0.181818	2.1052	0.00345708	0.00345708
alkane 1-monooxygenase activity	GO:0005504	25	10	13107	0.4	4.63145	2.14805e-05	2.14805e-05
fatty acid binding	GO:0018685	37	10	13107	0.27027	3.12936	0.000873086	0.000873086
medium-chain fatty acid omega-hydroxylase activity	GO:0140981	24	10	13107	0.416667	4.82443	1.39735e-05	1.39735e-05
amyloid-beta binding	GO:0001540	46	9	13107	0.195652	2.26538	0.0151659	0.0151659
heme binding	GO:0017022	53	9	13107	0.169811	1.96618	0.0439576	0.0439576
myosin binding	GO:0020037	53	9	13107	0.169811	1.96618	0.0439576	0.0439576
spectrin binding	GO:0030507	44	9	13107	0.204545	2.36835	0.0113978	0.0113978
UDP-glycosyltransferase activity	GO:0008194	25	8	13107	0.32	3.70516	0.000852163	0.000852163
hexosyltransferase activity	GO:0016758	24	8	13107	0.333333	3.85954	0.000626685	0.000626685
ABC-type xenobiotic transporter activity	GO:0008559	18	7	13107	0.388889	4.5028	0.000475172	0.000475172
ATP-dependent protein folding chaperone	GO:0022857	21	7	13107	0.333333	3.85954	0.00137725	0.00137725
proteoglycan binding	GO:0030159	32	7	13107	0.21875	2.53282	0.0172318	0.0172318
signaling receptor complex adaptor activity	GO:0043394	25	7	13107	0.28	3.24201	0.00418857	0.00418857
transmembrane transporter activity	GO:0099508	26	7	13107	0.269231	3.11732	0.00531013	0.00531013
voltage-gated monoatomic ion channel activity involved in regulation of presynaptic membrane potential	GO:0140662	16	7	13107	0.4375	5.06565	0.000199461	0.000199461
apolipoprotein binding	GO:0004806	25	6	13107	0.24	2.77887	0.0172568	0.0172568
glutamate binding	GO:0015459	21	6	13107	0.285714	3.30818	0.00712126	0.00712126
oxidoreductase activity, acting on paired donors, with incorporation or reduction of molecular oxygen, reduced flavin or flavoprotein as one donor, and incorporation of one atom of oxygen	GO:0016595	23	6	13107	0.26087	3.02051	0.0114114	0.0114114
potassium channel regulator activity	GO:0016712	30	6	13107	0.2	2.31572	0.0400371	0.0400371
triglyceride lipase activity	GO:0034185	28	6	13107	0.214286	2.48113	0.0294175	0.0294175
alcohol-forming very long-chain fatty acyl-CoA reductase activity	GO:0080019	15	5	13107	0.333333	3.85954	0.00683434	0.00683434
mannan binding	GO:0120019	18	5	13107	0.277778	3.21628	0.0156801	0.0156801
phosphatidylcholine transfer activity	GO:2001065	9	5	13107	0.555556	6.43257	0.000445839	0.000445839
C3HC4-type RING finger domain binding	GO:0000900	12	4	13107	0.333333	3.85954	0.0155543	0.0155543
UTP binding	GO:0002134	5	4	13107	0.8	9.2629	0.000257702	0.000257702
ceramide floppase activity	GO:0004879	6	4	13107	0.666667	7.71908	0.000719815	0.000719815
delayed rectifier potassium channel activity	GO:0005251	12	4	13107	0.333333	3.85954	0.0155543	0.0155543
inorganic cation transmembrane transporter activity	GO:0008188	9	4	13107	0.444444	5.14605	0.00488734	0.00488734
mRNA regulatory element binding translation repressor activity	GO:0016918	13	4	13107	0.307692	3.56265	0.0209551	0.0209551
modified amino acid binding	GO:0017098	9	4	13107	0.444444	5.14605	0.00488734	0.00488734
neuropeptide receptor activity	GO:0022890	14	4	13107	0.285714	3.30818	0.0273696	0.0273696
nitric-oxide synthase regulator activity	GO:0030235	13	4	13107	0.307692	3.56265	0.0209551	0.0209551
nuclear receptor activity	GO:0051378	12	4	13107	0.333333	3.85954	0.0155543	0.0155543
phosphatidylcholine flippase activity	GO:0055131	8	4	13107	0.5	5.78931	0.00291409	0.00291409
protein carrier chaperone	GO:0072341	5	4	13107	0.8	9.2629	0.000257702	0.000257702
retinal binding	GO:0099038	11	4	13107	0.363636	4.21041	0.0111208	0.0111208
serotonin binding	GO:0140345	13	4	13107	0.307692	3.56265	0.0209551	0.0209551
sulfonylurea receptor binding	GO:0140597	5	4	13107	0.8	9.2629	0.000257702	0.000257702
ATP-dependent protein disaggregase activity	GO:0002135	8	3	13107	0.375	4.34198	0.0258258	0.0258258
CTP binding	GO:0004035	3	3	13107	1	11.5786	0.000642654	0.000642654
G protein-coupled photoreceptor activity	GO:0008020	9	3	13107	0.333333	3.85954	0.0362878	0.0362878
G-protein gamma-subunit binding	GO:0008392	5	3	13107	0.6	6.94717	0.00562214	0.00562214
LBD domain binding	GO:0015101	6	3	13107	0.5	5.78931	0.0105222	0.0105222
Rho GDP-dissociation inhibitor binding	GO:0016725	9	3	13107	0.333333	3.85954	0.0362878	0.0362878
alkaline phosphatase activity	GO:0030296	10	3	13107	0.3	3.47359	0.0485769	0.0485769
arachidonic acid epoxygenase activity	GO:0030594	10	3	13107	0.3	3.47359	0.0485769	0.0485769
cysteine-type endopeptidase activity involved in apoptotic process	GO:0031402	9	3	13107	0.333333	3.85954	0.0362878	0.0362878
dATP binding	GO:0031682	4	3	13107	0.75	8.68397	0.00240397	0.00240397
dibutyl phthalate binding	GO:0032564	6	3	13107	0.5	5.78931	0.0105222	0.0105222
lactoperoxidase activity	GO:0033142	7	3	13107	0.428571	4.96227	0.0172372	0.0172372
metallodipeptidase activity	GO:0033883	8	3	13107	0.375	4.34198	0.0258258	0.0258258
neurotransmitter receptor activity	GO:0035275	8	3	13107	0.375	4.34198	0.0258258	0.0258258
nuclear progesterone receptor binding	GO:0050187	3	3	13107	1	11.5786	0.000642654	0.000642654
organic cation transmembrane transporter activity	GO:0050693	10	3	13107	0.3	3.47359	0.0485769	0.0485769
oxidoreductase activity, acting on CH or CH2 groups	GO:0051022	6	3	13107	0.5	5.78931	0.0105222	0.0105222
phosphoamidase activity	GO:0051119	10	3	13107	0.3	3.47359	0.0485769	0.0485769
phosphoethanolamine phosphatase activity	GO:0052732	10	3	13107	0.3	3.47359	0.0485769	0.0485769
protein tyrosine kinase activator activity	GO:0070573	7	3	13107	0.428571	4.96227	0.0172372	0.0172372
pyridoxal phosphatase activity	GO:0090722	10	3	13107	0.3	3.47359	0.0485769	0.0485769
receptor-receptor interaction	GO:0097153	7	3	13107	0.428571	4.96227	0.0172372	0.0172372
sodium ion binding	GO:0140545	10	3	13107	0.3	3.47359	0.0485769	0.0485769
sugar transmembrane transporter activity	GO:0140825	5	3	13107	0.6	6.94717	0.00562214	0.00562214
3'-phosphoadenosine 5'-phosphosulfate binding	GO:0001586	3	2	13107	0.666667	7.71908	0.0210708	0.0210708
5-methylcytosine dioxygenase activity	GO:0002950	2	2	13107	1	11.5786	0.00745308	0.00745308
A1 adenosine receptor binding	GO:0003990	4	2	13107	0.5	5.78931	0.0397319	0.0397319
ABC-type phytochelatin transporter activity	GO:0004143	3	2	13107	0.666667	7.71908	0.0210708	0.0210708
AF-1 domain binding	GO:0004556	2	2	13107	1	11.5786	0.00745308	0.00745308
ATP-dependent diacylglycerol kinase activity	GO:0005222	4	2	13107	0.5	5.78931	0.0397319	0.0397319
ATPase-coupled arsenite transmembrane transporter activity	GO:0005223	2	2	13107	1	11.5786	0.00745308	0.00745308
D-aspartate transmembrane transporter activity	GO:0005242	3	2	13107	0.666667	7.71908	0.0210708	0.0210708
Gi/o-coupled serotonin receptor activity	GO:0005314	2	2	13107	1	11.5786	0.00745308	0.00745308
acetylcholinesterase activity	GO:0008113	2	2	13107	1	11.5786	0.00745308	0.00745308
allatostatin receptor activity	GO:0008261	2	2	13107	1	11.5786	0.00745308	0.00745308
alpha-amylase activity	GO:0008332	4	2	13107	0.5	5.78931	0.0397319	0.0397319
broad specificity oxidative DNA demethylase activity	GO:0015294	2	2	13107	1	11.5786	0.00745308	0.00745308
ceramide cholinephosphotransferase activity	GO:0015446	2	2	13107	1	11.5786	0.00745308	0.00745308
ceramide phosphoethanolamine synthase activity	GO:0015636	2	2	13107	1	11.5786	0.00745308	0.00745308
clathrin-uncoating ATPase activity	GO:0019992	4	2	13107	0.5	5.78931	0.0397319	0.0397319
collagen V binding	GO:0030021	3	2	13107	0.666667	7.71908	0.0210708	0.0210708
cysteine transmembrane transporter activity	GO:0031686	3	2	13107	0.666667	7.71908	0.0210708	0.0210708
diacylglycerol binding	GO:0033188	4	2	13107	0.5	5.78931	0.0397319	0.0397319
extracellular matrix structural constituent conferring compression resistance	GO:0033229	4	2	13107	0.5	5.78931	0.0397319	0.0397319
high-affinity L-glutamate transmembrane transporter activity	GO:0035516	3	2	13107	0.666667	7.71908	0.0210708	0.0210708
intracellularly cAMP-activated cation channel activity	GO:0044604	4	2	13107	0.5	5.78931	0.0397319	0.0397319
intracellularly cGMP-activated cation channel activity	GO:0047493	4	2	13107	0.5	5.78931	0.0397319	0.0397319
inward rectifier potassium channel activity	GO:0050656	4	2	13107	0.5	5.78931	0.0397319	0.0397319
low voltage-gated calcium channel activity	GO:0050683	3	2	13107	0.666667	7.71908	0.0210708	0.0210708
metal ion sequestering activity	GO:0070052	2	2	13107	1	11.5786	0.00745308	0.00745308
peptide-methionine (S)-S-oxide reductase activity	GO:0070579	4	2	13107	0.5	5.78931	0.0397319	0.0397319
postsynaptic neurotransmitter receptor activity	GO:0098960	4	2	13107	0.5	5.78931	0.0397319	0.0397319
prostaglandin binding	GO:0140010	4	2	13107	0.5	5.78931	0.0397319	0.0397319
short-chain fatty acid transmembrane transporter activity	GO:0140487	4	2	13107	0.5	5.78931	0.0397319	0.0397319
solute:monoatomic cation symporter activity	GO:1904593	4	2	13107	0.5	5.78931	0.0397319	0.0397319
sphingomyelin synthase activity	GO:1990833	2	2	13107	1	11.5786	0.00745308	0.00745308

## Sheet: BP_1x5x10x_up
Table S2.6. Enriched Biological Processes Identified by GO Term Analysis from upregulated genes in 1x5x10x comparisons
BP_GO_terms	BP_GO_ID	total_genes_in_GO	Cands_in_GO	total_genes_in_background	GeneRatio	fold_enrichment	p_value	adj_p_value
determination of adult lifespan	GO:0008340	221	35	13107	0.158371	1.38847	0.0403596	0.0403596
mitochondrial translation	GO:0032543	34	30	13107	0.882353	7.73579	1.15985e-24	1.15985e-24
proteasome-mediated ubiquitin-dependent protein catabolic process	GO:0043161	140	27	13107	0.192857	1.69082	0.0046646	0.0046646
mitochondrial respiratory chain complex I assembly	GO:0006979	41	26	13107	0.634146	5.5597	2.79696e-15	2.79696e-15
response to oxidative stress	GO:0032981	149	26	13107	0.174497	1.52985	0.0257223	0.0257223
cytoplasmic translation	GO:0002181	54	26	13107	0.481481	4.22126	1.8382e-11	1.8382e-11
proton motive force-driven mitochondrial ATP synthesis	GO:0042776	32	23	13107	0.71875	6.30144	1.7556e-15	1.7556e-15
cytoplasmic translation	GO:0002181	49	21	13107	0.428571	3.75738	2.19555e-08	2.19555e-08
cellular process	GO:0009987	107	19	13107	0.17757	1.5568	0.0449395	0.0449395
translation at postsynapse	GO:0140242	39	18	13107	0.461538	4.04641	5.55937e-08	5.55937e-08
maturation of SSU-rRNA from tricistronic rRNA transcript (SSU-rRNA, 5.8S rRNA, LSU-rRNA)	GO:0000462	33	18	13107	0.545455	4.78212	1.82686e-09	1.82686e-09
mitochondrial electron transport, NADH to ubiquinone	GO:0006120	28	17	13107	0.607143	5.32296	5.30377e-10	5.30377e-10
response to glucose	GO:0009749	86	16	13107	0.186047	1.63111	0.0400861	0.0400861
biological_process	GO:0008150	84	16	13107	0.190476	1.66995	0.0361945	0.0361945
translation at presynapse	GO:0140236	31	15	13107	0.483871	4.24221	3.35008e-07	3.35008e-07
translation	GO:0006412	30	15	13107	0.5	4.38361	1.93422e-07	1.93422e-07
protein homotetramerization	GO:0040014	50	14	13107	0.28	2.45482	0.00102348	0.00102348
regulation of multicellular organism growth	GO:0051289	44	14	13107	0.318182	2.78957	0.000242457	0.000242457
mRNA splicing, via spliceosome	GO:0000398	46	14	13107	0.304348	2.66829	0.000406001	0.000406001
ribosomal small subunit biogenesis	GO:0042254	30	13	13107	0.433333	3.79913	9.52665e-06	9.52665e-06
ribosome biogenesis	GO:0042274	38	13	13107	0.342105	2.99931	0.000178433	0.000178433
embryo development ending in seed dormancy	GO:0006364	58	12	13107	0.206897	1.81391	0.0354644	0.0354644
rRNA processing	GO:0009793	44	12	13107	0.272727	2.39106	0.00293724	0.00293724
methylation	GO:0006367	34	11	13107	0.323529	2.83645	0.000954056	0.000954056
regulation of mitochondrial membrane potential	GO:0009409	28	11	13107	0.392857	3.44427	0.000137068	0.000137068
response to cold	GO:0032259	54	11	13107	0.203704	1.78592	0.0497216	0.0497216
transcription initiation at RNA polymerase II promoter	GO:0051881	24	11	13107	0.458333	4.01831	2.46259e-05	2.46259e-05
cell redox homeostasis	GO:0006362	29	10	13107	0.344828	3.02318	0.000927326	0.000927326
intracellular iron ion homeostasis	GO:0006457	40	10	13107	0.25	2.19181	0.0201187	0.0201187
protein folding	GO:0006879	32	10	13107	0.3125	2.73976	0.00216803	0.00216803
rescue of stalled ribosome	GO:0009737	29	10	13107	0.344828	3.02318	0.000927326	0.000927326
response to abscisic acid	GO:0045454	44	10	13107	0.227273	1.99255	0.0283856	0.0283856
transcription elongation by RNA polymerase I	GO:0072344	15	10	13107	0.666667	5.84482	6.30943e-07	6.30943e-07
U2-type prespliceosome assembly	GO:0009631	21	9	13107	0.428571	3.75738	0.000258578	0.000258578
cold acclimation	GO:0030150	24	9	13107	0.375	3.28771	0.000835964	0.000835964
protein K11-linked ubiquitination	GO:0070979	28	9	13107	0.321429	2.81804	0.00289259	0.00289259
protein import into mitochondrial matrix	GO:1903241	20	9	13107	0.45	3.94525	0.000164399	0.000164399
endonucleolytic cleavage of tricistronic rRNA transcript (SSU-rRNA, 5.8S rRNA, LSU-rRNA)	GO:0000398	19	8	13107	0.421053	3.69146	0.000662931	0.000662931
fatty acid beta-oxidation using acyl-CoA dehydrogenase	GO:0000479	13	8	13107	0.615385	5.39521	2.12773e-05	2.12773e-05
mRNA splicing, via spliceosome	GO:0033539	17	8	13107	0.470588	4.12575	0.000263191	0.000263191
protein insertion into mitochondrial inner membrane	GO:0045039	9	8	13107	0.888889	7.79309	2.27861e-07	2.27861e-07
glutathione metabolic process	GO:0006099	27	8	13107	0.296296	2.5977	0.00845677	0.00845677
mRNA processing	GO:0006364	28	8	13107	0.285714	2.50492	0.0106777	0.0106777
rRNA processing	GO:0006397	27	8	13107	0.296296	2.5977	0.00845677	0.00845677
tricarboxylic acid cycle	GO:0006749	11	8	13107	0.727273	6.37616	3.37455e-06	3.37455e-06
antimicrobial humoral immune response mediated by antimicrobial peptide	GO:0006363	15	7	13107	0.466667	4.09137	0.000692028	0.000692028
ceramide biosynthetic process	GO:0010499	26	7	13107	0.269231	2.36041	0.0229699	0.0229699
mitochondrial cytochrome c oxidase assembly	GO:0032543	12	7	13107	0.583333	5.11421	0.000116337	0.000116337
mitochondrial translation	GO:0033617	13	7	13107	0.538462	4.72081	0.000227129	0.000227129
negative regulation of amyloid fibril formation	GO:0042273	15	7	13107	0.466667	4.09137	0.000692028	0.000692028
proteasomal ubiquitin-independent protein catabolic process	GO:0046513	9	7	13107	0.777778	6.81895	7.23702e-06	7.23702e-06
protein maturation by [4Fe-4S] cluster transfer	GO:0061844	8	7	13107	0.875	7.67132	1.78628e-06	1.78628e-06
ribosomal large subunit biogenesis	GO:0106035	20	7	13107	0.35	3.06853	0.00498087	0.00498087
termination of RNA polymerase I transcription	GO:1905907	12	7	13107	0.583333	5.11421	0.000116337	0.000116337
deadenylation-dependent decapping of nuclear-transcribed mRNA	GO:0000028	13	7	13107	0.538462	4.72081	0.000227129	0.000227129
liver development	GO:0000290	28	7	13107	0.25	2.19181	0.0338139	0.0338139
oxidative phosphorylation	GO:0001889	8	7	13107	0.875	7.67132	1.78628e-06	1.78628e-06
ribosomal small subunit assembly	GO:0006119	15	7	13107	0.466667	4.09137	0.000692028	0.000692028
COPII vesicle coating	GO:0006268	16	6	13107	0.375	3.28771	0.00631785	0.00631785
DNA unwinding involved in DNA replication	GO:0006384	20	6	13107	0.3	2.63017	0.0205185	0.0205185
[2Fe-2S] cluster assembly	GO:0006386	7	6	13107	0.857143	7.51476	1.37832e-05	1.37832e-05
[4Fe-4S] cluster assembly	GO:0006412	7	6	13107	0.857143	7.51476	1.37832e-05	1.37832e-05
amide catabolic process	GO:0006413	16	6	13107	0.375	3.28771	0.00631785	0.00631785
canonical glycolysis	GO:0006694	14	6	13107	0.428571	3.75738	0.00289751	0.00289751
glutathione metabolic process	GO:0006749	22	6	13107	0.272727	2.39106	0.0324157	0.0324157
iron-sulfur cluster assembly	GO:0014075	12	6	13107	0.5	4.38361	0.0010916	0.0010916
maturation of SSU-rRNA	GO:0016226	12	6	13107	0.5	4.38361	0.0010916	0.0010916
response to amine	GO:0030490	20	6	13107	0.3	2.63017	0.0205185	0.0205185
steroid biosynthetic process	GO:0035999	19	6	13107	0.315789	2.7686	0.0158622	0.0158622
tRNA transcription by RNA polymerase III	GO:0042761	16	6	13107	0.375	3.28771	0.00631785	0.00631785
termination of RNA polymerase III transcription	GO:0042797	12	6	13107	0.5	4.38361	0.0010916	0.0010916
tetrahydrofolate interconversion	GO:0043605	7	6	13107	0.857143	7.51476	1.37832e-05	1.37832e-05
transcription initiation at RNA polymerase III promoter	GO:0044571	10	6	13107	0.6	5.26033	0.000304095	0.000304095
translation	GO:0044572	20	6	13107	0.3	2.63017	0.0205185	0.0205185
translational initiation	GO:0048208	19	6	13107	0.315789	2.7686	0.0158622	0.0158622
very long-chain fatty acid biosynthetic process	GO:0061621	22	6	13107	0.272727	2.39106	0.0324157	0.0324157
aerobic respiration	GO:0001732	8	6	13107	0.75	6.57542	4.97521e-05	4.97521e-05
formation of cytoplasmic translation initiation complex	GO:0009060	15	6	13107	0.4	3.50689	0.00436614	0.00436614
7-methylguanosine cap hypermethylation	GO:0000462	10	5	13107	0.5	4.38361	0.00294392	0.00294392
butyrate catabolic process	GO:0006279	5	5	13107	1	8.76722	1.91917e-05	1.91917e-05
compound eye pigmentation	GO:0006569	11	5	13107	0.454545	3.9851	0.00489206	0.00489206
cortical microtubule organization	GO:0007021	17	5	13107	0.294118	2.5786	0.0366166	0.0366166
cytoplasm protein quality control by the ubiquitin-proteasome system	GO:0022904	12	5	13107	0.416667	3.65301	0.00760419	0.00760419
ectopic germ cell programmed cell death	GO:0034551	13	5	13107	0.384615	3.37201	0.0112083	0.0112083
folic acid metabolic process	GO:0035234	6	5	13107	0.833333	7.30602	0.000104198	0.000104198
glyceraldehyde-3-phosphate biosynthetic process	GO:0036261	11	5	13107	0.454545	3.9851	0.00489206	0.00489206
maintenance of translational fidelity	GO:0043622	9	5	13107	0.555556	4.87068	0.00162451	0.00162451
maturation of SSU-rRNA from tricistronic rRNA transcript (SSU-rRNA, 5.8S rRNA, LSU-rRNA)	GO:0046166	18	5	13107	0.277778	2.43534	0.0460755	0.0460755
mitochondrial respiratory chain complex III assembly	GO:0046359	8	5	13107	0.625	5.47952	0.000797104	0.000797104
mitotic DNA replication initiation	GO:0046655	8	5	13107	0.625	5.47952	0.000797104	0.000797104
phospholipid homeostasis	GO:0046689	16	5	13107	0.3125	2.73976	0.0284524	0.0284524
positive regulation of mitochondrial translation	GO:0048072	14	5	13107	0.357143	3.13115	0.0158205	0.0158205
premeiotic DNA replication	GO:0055091	8	5	13107	0.625	5.47952	0.000797104	0.000797104
reactive oxygen species metabolic process	GO:0070131	17	5	13107	0.294118	2.5786	0.0366166	0.0366166
respiratory electron transport chain	GO:0071629	15	5	13107	0.333333	2.92241	0.0215412	0.0215412
response to mercury ion	GO:0071816	13	5	13107	0.384615	3.37201	0.0112083	0.0112083
tail-anchored membrane protein insertion into ER membrane	GO:0072593	13	5	13107	0.384615	3.37201	0.0112083	0.0112083
tryptophan catabolic process	GO:0099022	8	5	13107	0.625	5.47952	0.000797104	0.000797104
tubulin complex assembly	GO:1902975	13	5	13107	0.384615	3.37201	0.0112083	0.0112083
vesicle tethering	GO:1990145	8	5	13107	0.625	5.47952	0.000797104	0.000797104
dolichol-linked oligosaccharide biosynthetic process	GO:0000727	13	5	13107	0.384615	3.37201	0.0112083	0.0112083
double-strand break repair via break-induced replication	GO:0006006	9	5	13107	0.555556	4.87068	0.00162451	0.00162451
gluconeogenesis	GO:0006094	10	5	13107	0.5	4.38361	0.00294392	0.00294392
glucose metabolic process	GO:0006122	16	5	13107	0.3125	2.73976	0.0284524	0.0284524
mitochondrial cytochrome c oxidase assembly	GO:0006123	7	5	13107	0.714286	6.2623	0.000330116	0.000330116
mitochondrial electron transport, cytochrome c to oxygen	GO:0006368	8	5	13107	0.625	5.47952	0.000797104	0.000797104
mitochondrial electron transport, ubiquinol to cytochrome c	GO:0006488	11	5	13107	0.454545	3.9851	0.00489206	0.00489206
positive regulation of cell population proliferation	GO:0006979	10	5	13107	0.5	4.38361	0.00294392	0.00294392
response to oxidative stress	GO:0008284	18	5	13107	0.277778	2.43534	0.0460755	0.0460755
transcription elongation by RNA polymerase II	GO:0033617	6	5	13107	0.833333	7.30602	0.000104198	0.000104198
DNA strand elongation involved in DNA replication	GO:0000463	9	4	13107	0.444444	3.89654	0.013224	0.013224
GMP catabolic process	GO:0006105	5	4	13107	0.8	7.01378	0.000766293	0.000766293
IRES-dependent viral translational initiation	GO:0006110	10	4	13107	0.4	3.50689	0.0200721	0.0200721
acyl-CoA metabolic process	GO:0006161	12	4	13107	0.333333	2.92241	0.039297	0.039297
cellular respiration	GO:0006206	9	4	13107	0.444444	3.89654	0.013224	0.013224
dGMP catabolic process	GO:0006271	8	4	13107	0.5	4.38361	0.00807062	0.00807062
deoxyguanosine catabolic process	GO:0006369	7	4	13107	0.571429	5.00984	0.00443497	0.00443497
embryonic cleavage	GO:0006637	11	4	13107	0.363636	3.18808	0.0287392	0.0287392
error-prone translesion synthesis	GO:0006998	10	4	13107	0.4	3.50689	0.0200721	0.0200721
fructose biosynthetic process	GO:0008033	11	4	13107	0.363636	3.18808	0.0287392	0.0287392
hyperosmotic salinity response	GO:0009113	11	4	13107	0.363636	3.18808	0.0287392	0.0287392
male germ-line cyst encapsulation	GO:0009933	8	4	13107	0.5	4.38361	0.00807062	0.00807062
maturation of LSU-rRNA from tricistronic rRNA transcript (SSU-rRNA, 5.8S rRNA, LSU-rRNA)	GO:0010584	9	4	13107	0.444444	3.89654	0.013224	0.013224
meristem structural organization	GO:0033146	10	4	13107	0.4	3.50689	0.0200721	0.0200721
mitochondrial respirasome assembly	GO:0033234	6	4	13107	0.666667	5.84482	0.00208988	0.00208988
mitochondrial tRNA methylation	GO:0036258	4	4	13107	1	8.76722	0.000168658	0.000168658
multivesicular body assembly	GO:0039702	12	4	13107	0.333333	2.92241	0.039297	0.039297
negative regulation of autophagosome assembly	GO:0040016	12	4	13107	0.333333	2.92241	0.039297	0.039297
negative regulation of protein sumoylation	GO:0040027	8	4	13107	0.5	4.38361	0.00807062	0.00807062
negative regulation of vulval development	GO:0042276	11	4	13107	0.363636	3.18808	0.0287392	0.0287392
nuclear envelope organization	GO:0042538	8	4	13107	0.5	4.38361	0.00807062	0.00807062
platelet dense granule organization	GO:0045047	12	4	13107	0.333333	2.92241	0.039297	0.039297
pollen exine formation	GO:0045333	9	4	13107	0.444444	3.89654	0.013224	0.013224
proteasome regulatory particle assembly	GO:0046038	9	4	13107	0.444444	3.89654	0.013224	0.013224
protein K69-linked ufmylation	GO:0046055	4	4	13107	1	8.76722	0.000168658	0.000168658
protein heterotetramerization	GO:0046370	10	4	13107	0.4	3.50689	0.0200721	0.0200721
protein targeting to ER	GO:0048140	10	4	13107	0.4	3.50689	0.0200721	0.0200721
purine nucleobase biosynthetic process	GO:0051290	6	4	13107	0.666667	5.84482	0.00208988	0.00208988
pyrimidine nucleobase metabolic process	GO:0060155	6	4	13107	0.666667	5.84482	0.00208988	0.00208988
regulation of glycolytic process	GO:0070682	11	4	13107	0.363636	3.18808	0.0287392	0.0287392
regulation of intracellular estrogen receptor signaling pathway	GO:0070901	9	4	13107	0.444444	3.89654	0.013224	0.013224
succinate metabolic process	GO:0075522	5	4	13107	0.8	7.01378	0.000766293	0.000766293
tRNA processing	GO:0097250	11	4	13107	0.363636	3.18808	0.0287392	0.0287392
termination of RNA polymerase II transcription	GO:1902902	10	4	13107	0.4	3.50689	0.0200721	0.0200721
viral budding via host ESCRT complex	GO:1990592	10	4	13107	0.4	3.50689	0.0200721	0.0200721
ATP biosynthetic process	GO:0000055	4	4	13107	1	8.76722	0.000168658	0.000168658
allantoin metabolic process	GO:0000255	9	4	13107	0.444444	3.89654	0.013224	0.013224
cytoplasmic translational elongation	GO:0000338	5	4	13107	0.8	7.01378	0.000766293	0.000766293
fatty acid beta-oxidation	GO:0002182	5	4	13107	0.8	7.01378	0.000766293	0.000766293
iron-sulfur cluster assembly	GO:0002939	8	4	13107	0.5	4.38361	0.00807062	0.00807062
isoleucine catabolic process	GO:0006361	4	4	13107	1	8.76722	0.000168658	0.000168658
mitochondrial proton-transporting ATP synthase complex assembly	GO:0006550	4	4	13107	1	8.76722	0.000168658	0.000168658
mitochondrial transport	GO:0006635	6	4	13107	0.666667	5.84482	0.00208988	0.00208988
protein deneddylation	GO:0006744	9	4	13107	0.444444	3.89654	0.013224	0.013224
response to osmotic stress	GO:0006754	8	4	13107	0.5	4.38361	0.00807062	0.00807062
ribosomal large subunit export from nucleus	GO:0006839	10	4	13107	0.4	3.50689	0.0200721	0.0200721
tRNA N1-guanine methylation	GO:0006970	4	4	13107	1	8.76722	0.000168658	0.000168658
transcription initiation at RNA polymerase I promoter	GO:0016226	7	4	13107	0.571429	5.00984	0.00443497	0.00443497
ubiquinone biosynthetic process	GO:0033615	11	4	13107	0.363636	3.18808	0.0287392	0.0287392
'de novo' AMP biosynthetic process	GO:0000466	7	3	13107	0.428571	3.75738	0.0363761	0.0363761
'de novo' IMP biosynthetic process	GO:0000470	6	3	13107	0.5	4.38361	0.0226912	0.0226912
'de novo' XMP biosynthetic process	GO:0002082	7	3	13107	0.428571	3.75738	0.0363761	0.0363761
COP9 signalosome assembly	GO:0006119	4	3	13107	0.75	6.57542	0.005418	0.005418
COPI coating of Golgi vesicle	GO:0006147	5	3	13107	0.6	5.26033	0.0123929	0.0123929
IMP catabolic process	GO:0006148	7	3	13107	0.428571	3.75738	0.0363761	0.0363761
ISG15-protein conjugation	GO:0006149	6	3	13107	0.5	4.38361	0.0226912	0.0226912
L-amino acid catabolic process	GO:0006154	4	3	13107	0.75	6.57542	0.005418	0.005418
NADP metabolic process	GO:0006157	7	3	13107	0.428571	3.75738	0.0363761	0.0363761
adenosine catabolic process	GO:0006189	6	3	13107	0.5	4.38361	0.0226912	0.0226912
adenosine metabolic process	GO:0006204	7	3	13107	0.428571	3.75738	0.0363761	0.0363761
carpel development	GO:0006231	3	3	13107	1	8.76722	0.00148129	0.00148129
dAMP catabolic process	GO:0006235	6	3	13107	0.5	4.38361	0.0226912	0.0226912
dTMP biosynthetic process	GO:0006267	5	3	13107	0.6	5.26033	0.0123929	0.0123929
dTTP biosynthetic process	GO:0006361	6	3	13107	0.5	4.38361	0.0226912	0.0226912
deoxyadenosine catabolic process	GO:0006627	6	3	13107	0.5	4.38361	0.0226912	0.0226912
deoxyinosine catabolic process	GO:0006739	7	3	13107	0.428571	3.75738	0.0363761	0.0363761
establishment or maintenance of neuroblast polarity	GO:0009086	7	3	13107	0.428571	3.75738	0.0363761	0.0363761
ethylene-activated signaling pathway	GO:0009114	5	3	13107	0.6	5.26033	0.0123929	0.0123929
galactose catabolic process via UDP-galactose	GO:0009115	6	3	13107	0.5	4.38361	0.0226912	0.0226912
guanine catabolic process	GO:0009154	5	3	13107	0.6	5.26033	0.0123929	0.0123929
hypoxanthine catabolic process	GO:0009867	5	3	13107	0.6	5.26033	0.0123929	0.0123929
inosine catabolic process	GO:0009873	7	3	13107	0.428571	3.75738	0.0363761	0.0363761
jasmonic acid mediated signaling pathway	GO:0010082	7	3	13107	0.428571	3.75738	0.0363761	0.0363761
leaf formation	GO:0010305	3	3	13107	1	8.76722	0.00148129	0.00148129
leaf shaping	GO:0010338	3	3	13107	1	8.76722	0.00148129	0.00148129
leaf vascular tissue pattern formation	GO:0010358	7	3	13107	0.428571	3.75738	0.0363761	0.0363761
maturation of 5.8S rRNA from tricistronic rRNA transcript (SSU-rRNA, 5.8S rRNA, LSU-rRNA)	GO:0010387	7	3	13107	0.428571	3.75738	0.0363761	0.0363761
maturation of LSU-rRNA	GO:0010845	3	3	13107	1	8.76722	0.00148129	0.00148129
methionine biosynthetic process	GO:0019068	4	3	13107	0.75	6.57542	0.005418	0.005418
mitochondrial ATP synthesis coupled electron transport	GO:0030466	7	3	13107	0.428571	3.75738	0.0363761	0.0363761
mitochondrial respiratory chain complex assembly	GO:0031120	6	3	13107	0.5	4.38361	0.0226912	0.0226912
mitochondrial ribosome assembly	GO:0032020	5	3	13107	0.6	5.26033	0.0123929	0.0123929
mitochondrial tRNA 3'-end processing	GO:0032790	4	3	13107	0.75	6.57542	0.005418	0.005418
multi-pass transmembrane protein insertion into ER membrane	GO:0033108	6	3	13107	0.5	4.38361	0.0226912	0.0226912
musculoskeletal movement	GO:0033499	7	3	13107	0.428571	3.75738	0.0363761	0.0363761
negative regulation of DNA metabolic process	GO:0034418	7	3	13107	0.428571	3.75738	0.0363761	0.0363761
negative regulation of post-translational protein modification	GO:0042775	5	3	13107	0.6	5.26033	0.0123929	0.0123929
negative regulation of vasculogenesis	GO:0044208	4	3	13107	0.75	6.57542	0.005418	0.005418
oxidative phosphorylation	GO:0045196	5	3	13107	0.6	5.26033	0.0123929	0.0123929
positive regulation of androgen receptor activity	GO:0046059	5	3	13107	0.6	5.26033	0.0123929	0.0123929
positive regulation of cellular response to amino acid starvation	GO:0046085	7	3	13107	0.428571	3.75738	0.0363761	0.0363761
positive regulation of cytochrome-c oxidase activity	GO:0046761	4	3	13107	0.75	6.57542	0.005418	0.005418
positive regulation of mitochondrial electron transport, NADH to ubiquinone	GO:0048205	3	3	13107	1	8.76722	0.00148129	0.00148129
positive regulation of phospholipid biosynthetic process	GO:0048440	5	3	13107	0.6	5.26033	0.0123929	0.0123929
positive regulation of protein localization to chromatin	GO:0048443	6	3	13107	0.5	4.38361	0.0226912	0.0226912
positive regulation of reciprocal meiotic recombination	GO:0048453	6	3	13107	0.5	4.38361	0.0226912	0.0226912
positive regulation of reticulophagy	GO:0050881	4	3	13107	0.75	6.57542	0.005418	0.005418
positive regulation of telomerase RNA localization to Cajal body	GO:0051053	5	3	13107	0.6	5.26033	0.0123929	0.0123929
pre-replicative complex assembly involved in nuclear cell cycle DNA replication	GO:0051469	5	3	13107	0.6	5.26033	0.0123929	0.0123929
protein processing involved in protein targeting to mitochondrion	GO:0060785	6	3	13107	0.5	4.38361	0.0226912	0.0226912
proteinogenic amino acid catabolic process	GO:0061668	4	3	13107	0.75	6.57542	0.005418	0.005418
purine ribonucleotide catabolic process	GO:0070193	6	3	13107	0.5	4.38361	0.0226912	0.0226912
regulation of apoptosis involved in tissue homeostasis	GO:0071073	7	3	13107	0.428571	3.75738	0.0363761	0.0363761
regulation of oxidative phosphorylation	GO:0097294	4	3	13107	0.75	6.57542	0.005418	0.005418
regulation of root meristem growth	GO:0120187	6	3	13107	0.5	4.38361	0.0226912	0.0226912
ribosome disassembly	GO:0140501	7	3	13107	0.428571	3.75738	0.0363761	0.0363761
sepal formation	GO:0160063	3	3	13107	1	8.76722	0.00148129	0.00148129
silent mating-type cassette heterochromatin formation	GO:0170035	7	3	13107	0.428571	3.75738	0.0363761	0.0363761
snRNA pseudouridine synthesis	GO:0170040	4	3	13107	0.75	6.57542	0.005418	0.005418
stamen development	GO:1901874	3	3	13107	1	8.76722	0.00148129	0.00148129
synaptonemal complex organization	GO:1902958	6	3	13107	0.5	4.38361	0.0226912	0.0226912
telomerase holoenzyme complex assembly	GO:1903833	7	3	13107	0.428571	3.75738	0.0363761	0.0363761
transcription initiation at RNA polymerase I promoter	GO:1904874	7	3	13107	0.428571	3.75738	0.0363761	0.0363761
urate biosynthetic process	GO:1904960	7	3	13107	0.428571	3.75738	0.0363761	0.0363761
vesicle fusion with vacuole	GO:1905323	6	3	13107	0.5	4.38361	0.0226912	0.0226912
viral budding from plasma membrane	GO:1990180	7	3	13107	0.428571	3.75738	0.0363761	0.0363761
virion assembly	GO:2000825	6	3	13107	0.5	4.38361	0.0226912	0.0226912
xanthine catabolic process	GO:2001213	5	3	13107	0.6	5.26033	0.0123929	0.0123929
L-leucine catabolic process	GO:0000050	4	3	13107	0.75	6.57542	0.005418	0.005418
acetyl-CoA biosynthetic process from pyruvate	GO:0000387	5	3	13107	0.6	5.26033	0.0123929	0.0123929
cytoplasmic translational initiation	GO:0000470	5	3	13107	0.6	5.26033	0.0123929	0.0123929
maturation of LSU-rRNA	GO:0002183	5	3	13107	0.6	5.26033	0.0123929	0.0123929
negative regulation of apoptotic process	GO:0006086	3	3	13107	1	8.76722	0.00148129	0.00148129
positive regulation of insulin secretion	GO:0006465	4	3	13107	0.75	6.57542	0.005418	0.005418
protein N-linked glycosylation	GO:0006487	7	3	13107	0.428571	3.75738	0.0363761	0.0363761
proton motive force-driven mitochondrial ATP synthesis	GO:0006552	3	3	13107	1	8.76722	0.00148129	0.00148129
signal peptide processing	GO:0032024	7	3	13107	0.428571	3.75738	0.0363761	0.0363761
spliceosomal snRNP assembly	GO:0042776	6	3	13107	0.5	4.38361	0.0226912	0.0226912
urea cycle	GO:0043066	7	3	13107	0.428571	3.75738	0.0363761	0.0363761
10-formyltetrahydrofolate biosynthetic process	GO:0000053	2	2	13107	1	8.76722	0.0130022	0.0130022
ADP biosynthetic process	GO:0000338	3	2	13107	0.666667	5.84482	0.0360389	0.0360389
CD4-positive, alpha-beta T cell lineage commitment	GO:0001195	3	2	13107	0.666667	5.84482	0.0360389	0.0360389
D-alanine catabolic process	GO:0006086	2	2	13107	1	8.76722	0.0130022	0.0130022
ESCRT III complex disassembly	GO:0006121	3	2	13107	0.666667	5.84482	0.0360389	0.0360389
L-kynurenine metabolic process	GO:0006123	2	2	13107	1	8.76722	0.0130022	0.0130022
acetyl-CoA biosynthetic process from pyruvate	GO:0006172	3	2	13107	0.666667	5.84482	0.0360389	0.0360389
argininosuccinate metabolic process	GO:0006497	2	2	13107	1	8.76722	0.0130022	0.0130022
cellular response to gibberellin stimulus	GO:0006574	3	2	13107	0.666667	5.84482	0.0360389	0.0360389
choline catabolic process	GO:0006825	3	2	13107	0.666667	5.84482	0.0360389	0.0360389
constitutive secretory pathway	GO:0006850	3	2	13107	0.666667	5.84482	0.0360389	0.0360389
copper ion transport	GO:0007091	2	2	13107	1	8.76722	0.0130022	0.0130022
elastin catabolic process	GO:0008615	3	2	13107	0.666667	5.84482	0.0360389	0.0360389
endoplasmic reticulum tubular network membrane organization	GO:0009052	3	2	13107	0.666667	5.84482	0.0360389	0.0360389
error-free postreplication DNA repair	GO:0009185	2	2	13107	1	8.76722	0.0130022	0.0130022
establishment of protein localization to peroxisome	GO:0009257	3	2	13107	0.666667	5.84482	0.0360389	0.0360389
intracellular acyl-CoA homeostasis	GO:0009699	2	2	13107	1	8.76722	0.0130022	0.0130022
intracellular lipid transport	GO:0010124	3	2	13107	0.666667	5.84482	0.0360389	0.0360389
maintenance of transcriptional fidelity during transcription elongation by RNA polymerase III	GO:0010197	2	2	13107	1	8.76722	0.0130022	0.0130022
metaphase/anaphase transition of mitotic cell cycle	GO:0010375	2	2	13107	1	8.76722	0.0130022	0.0130022
mitochondrial electron transport, cytochrome c to oxygen	GO:0016926	2	2	13107	1	8.76722	0.0130022	0.0130022
mitochondrial electron transport, succinate to ubiquinone	GO:0019323	3	2	13107	0.666667	5.84482	0.0360389	0.0360389
mitochondrial pyruvate transmembrane transport	GO:0019941	2	2	13107	1	8.76722	0.0130022	0.0130022
mitochondrial tRNA 5'-end processing	GO:0031999	2	2	13107	1	8.76722	0.0130022	0.0130022
mitochondrial translational elongation	GO:0032365	2	2	13107	1	8.76722	0.0130022	0.0130022
modification-dependent protein catabolic process	GO:0042049	3	2	13107	0.666667	5.84482	0.0360389	0.0360389
negative regulation of fatty acid beta-oxidation	GO:0042275	3	2	13107	0.666667	5.84482	0.0360389	0.0360389
negative regulation of hydrogen peroxide-induced neuron intrinsic apoptotic signaling pathway	GO:0042426	2	2	13107	1	8.76722	0.0130022	0.0130022
negative regulation of protein lipidation	GO:0042818	2	2	13107	1	8.76722	0.0130022	0.0130022
negative regulation of protein localization to endoplasmic reticulum	GO:0043373	2	2	13107	1	8.76722	0.0130022	0.0130022
negative regulation of receptor localization to synapse	GO:0045054	2	2	13107	1	8.76722	0.0130022	0.0130022
negative regulation of thrombin-activated receptor signaling pathway	GO:0046105	3	2	13107	0.666667	5.84482	0.0360389	0.0360389
pentose catabolic process	GO:0055130	3	2	13107	0.666667	5.84482	0.0360389	0.0360389
pentose-phosphate shunt, non-oxidative branch	GO:0060309	3	2	13107	0.666667	5.84482	0.0360389	0.0360389
phenylacetate catabolic process	GO:0070125	2	2	13107	1	8.76722	0.0130022	0.0130022
phenylpropanoid biosynthetic process	GO:0070495	2	2	13107	1	8.76722	0.0130022	0.0130022
polar nucleus fusion	GO:0071370	2	2	13107	1	8.76722	0.0130022	0.0130022
positive regulation of long-chain fatty acid import into cell	GO:0071569	2	2	13107	1	8.76722	0.0130022	0.0130022
proteasome core complex assembly	GO:0072663	2	2	13107	1	8.76722	0.0130022	0.0130022
protein deneddylation	GO:0080129	3	2	13107	0.666667	5.84482	0.0360389	0.0360389
protein desumoylation	GO:0097052	3	2	13107	0.666667	5.84482	0.0360389	0.0360389
protein lipidation	GO:0097184	3	2	13107	0.666667	5.84482	0.0360389	0.0360389
protein maturation by iron-sulfur cluster transfer	GO:0097428	3	2	13107	0.666667	5.84482	0.0360389	0.0360389
protein ufmylation	GO:0097745	2	2	13107	1	8.76722	0.0130022	0.0130022
pyridoxamine metabolic process	GO:0099532	2	2	13107	1	8.76722	0.0130022	0.0130022
pyridoxine biosynthetic process	GO:0140214	2	2	13107	1	8.76722	0.0130022	0.0130022
regulation of cardiolipin metabolic process	GO:1900208	3	2	13107	0.666667	5.84482	0.0360389	0.0360389
regulation of nuclear-transcribed mRNA catabolic process, nonsense-mediated decay	GO:1901289	3	2	13107	0.666667	5.84482	0.0360389	0.0360389
regulation of phosphatidylcholine biosynthetic process	GO:1902684	2	2	13107	1	8.76722	0.0130022	0.0130022
regulation of protein targeting to mitochondrion	GO:1903060	3	2	13107	0.666667	5.84482	0.0360389	0.0360389
response to azide	GO:1903214	2	2	13107	1	8.76722	0.0130022	0.0130022
ribonucleoside diphosphate metabolic process	GO:1903384	2	2	13107	1	8.76722	0.0130022	0.0130022
stomatal complex patterning	GO:1904903	3	2	13107	0.666667	5.84482	0.0360389	0.0360389
succinyl-CoA catabolic process	GO:1905551	3	2	13107	0.666667	5.84482	0.0360389	0.0360389
synaptic vesicle endosomal processing	GO:1990809	3	2	13107	0.666667	5.84482	0.0360389	0.0360389
thymidine biosynthetic process	GO:2000622	2	2	13107	1	8.76722	0.0130022	0.0130022
valine catabolic process	GO:2001245	3	2	13107	0.666667	5.84482	0.0360389	0.0360389
GMP biosynthetic process	GO:0000056	3	2	13107	0.666667	5.84482	0.0360389	0.0360389
L-histidine biosynthetic process	GO:0000105	2	2	13107	1	8.76722	0.0130022	0.0130022
SRP-dependent cotranslational protein targeting to membrane	GO:0000454	3	2	13107	0.666667	5.84482	0.0360389	0.0360389
activation of cysteine-type endopeptidase activity involved in apoptotic process	GO:0006177	3	2	13107	0.666667	5.84482	0.0360389	0.0360389
amino acid catabolic process	GO:0006432	2	2	13107	1	8.76722	0.0130022	0.0130022
cellular respiration	GO:0006614	2	2	13107	1	8.76722	0.0130022	0.0130022
embryo development ending in seed dormancy	GO:0006919	3	2	13107	0.666667	5.84482	0.0360389	0.0360389
maturation of SSU-rRNA	GO:0009063	2	2	13107	1	8.76722	0.0130022	0.0130022
mitochondrial respiratory chain complex III assembly	GO:0009301	2	2	13107	1	8.76722	0.0130022	0.0130022
phenylalanyl-tRNA aminoacylation	GO:0009306	3	2	13107	0.666667	5.84482	0.0360389	0.0360389
protein insertion into ER membrane by stop-transfer membrane-anchor sequence	GO:0009408	3	2	13107	0.666667	5.84482	0.0360389	0.0360389
protein secretion	GO:0009793	3	2	13107	0.666667	5.84482	0.0360389	0.0360389
response to heat	GO:0030490	2	2	13107	1	8.76722	0.0130022	0.0130022
ribosomal small subunit export from nucleus	GO:0033209	3	2	13107	0.666667	5.84482	0.0360389	0.0360389
snRNA transcription	GO:0034551	2	2	13107	1	8.76722	0.0130022	0.0130022
snoRNA guided rRNA pseudouridine synthesis	GO:0045050	3	2	13107	0.666667	5.84482	0.0360389	0.0360389
tumor necrosis factor-mediated signaling pathway	GO:0045333	2	2	13107	1	8.76722	0.0130022	0.0130022

## Sheet: MF_1x5x10x_up
Table S2.7. Enriched molecular functions Identified by GO Term Analysis from upregulated genes in 1x5x10x comparisons
MF_GO_terms	MF_GO_ID	total_genes_in_GO	Cands_in_GO	total_genes_in_background	GeneRatio	fold_enrichment	p_value	adj_p_value
protein binding	GO:0005515	3163	499	13107	0.157762	1.38313	3.13966e-37	3.13966e-37
structural constituent of ribosome	GO:0003735	143	90	13107	0.629371	5.51783	1.32212e-49	1.32212e-49
mRNA binding	GO:0003729	223	55	13107	0.246637	2.16232	1.26629e-08	1.26629e-08
RNA binding	GO:0003723	275	52	13107	0.189091	1.6578	0.000144544	0.000144544
protein binding	GO:0005515	91	28	13107	0.307692	2.69761	4.81919e-07	4.81919e-07
NADH dehydrogenase (ubiquinone) activity	GO:0008137	31	19	13107	0.612903	5.37346	3.92878e-11	3.92878e-11
single-stranded DNA binding	GO:0003697	83	17	13107	0.204819	1.7957	0.0139348	0.0139348
2 iron, 2 sulfur cluster binding	GO:0051537	23	15	13107	0.652174	5.71775	1.34293e-09	1.34293e-09
tRNA binding	GO:0000049	57	15	13107	0.263158	2.30716	0.00137239	0.00137239
electron transfer activity	GO:0009055	37	14	13107	0.378378	3.31733	2.79107e-05	2.79107e-05
iron ion binding	GO:0005506	47	14	13107	0.297872	2.61151	0.000518078	0.000518078
4 iron, 4 sulfur cluster binding	GO:0046933	36	12	13107	0.333333	2.92241	0.000414729	0.000414729
proton-transporting ATP synthase activity, rotational mechanism	GO:0019843	18	12	13107	0.666667	5.84482	4.4444e-08	4.4444e-08
rRNA binding	GO:0051539	34	12	13107	0.352941	3.09431	0.000225935	0.000225935
ribosome binding	GO:0003743	55	12	13107	0.218182	1.91285	0.0292675	0.0292675
translation initiation factor activity	GO:0043022	45	12	13107	0.266667	2.33793	0.0035962	0.0035962
peptidyl-prolyl cis-trans isomerase activity	GO:0003755	22	11	13107	0.5	4.38361	8.65862e-06	8.65862e-06
copper ion binding	GO:0004364	34	10	13107	0.294118	2.5786	0.0035622	0.0035622
glutathione transferase activity	GO:0005507	34	10	13107	0.294118	2.5786	0.0035622	0.0035622
ribonucleoprotein complex binding	GO:0043021	44	10	13107	0.227273	1.99255	0.0283856	0.0283856
FAD binding	GO:0032977	28	9	13107	0.321429	2.81804	0.00289259	0.00289259
cargo receptor activity	GO:0038024	26	9	13107	0.346154	3.03481	0.00161624	0.00161624
membrane insertase activity	GO:0061631	16	9	13107	0.5625	4.93156	1.71871e-05	1.71871e-05
ubiquitin conjugating enzyme activity	GO:0071949	26	9	13107	0.346154	3.03481	0.00161624	0.00161624
fatty-acyl-CoA binding	GO:0000062	16	8	13107	0.5	4.38361	0.000154848	0.000154848
glutathione peroxidase activity	GO:0070628	32	8	13107	0.25	2.19181	0.0239614	0.0239614
proteasome binding	GO:0004602	19	8	13107	0.421053	3.69146	0.000662931	0.000662931
RNA polymerase I activity	GO:0001054	11	7	13107	0.636364	5.57914	5.38066e-05	5.38066e-05
protein folding chaperone	GO:0015035	24	7	13107	0.291667	2.55711	0.0147941	0.0147941
protein-disulfide reductase activity	GO:0046961	15	7	13107	0.466667	4.09137	0.000692028	0.000692028
proton-transporting ATPase activity, rotational mechanism	GO:0044183	23	7	13107	0.304348	2.66829	0.0115987	0.0115987
DDT-dehydrochlorinase activity	GO:0001056	23	6	13107	0.26087	2.2871	0.03975	0.03975
DNA replication origin binding	GO:0008656	17	6	13107	0.352941	3.09431	0.00883295	0.00883295
RNA polymerase III activity	GO:0003968	11	6	13107	0.545455	4.78212	0.00060419	0.00060419
RNA-dependent RNA polymerase activity	GO:0004129	13	6	13107	0.461538	4.04641	0.00183183	0.00183183
cysteine-type endopeptidase activator activity involved in apoptotic process	GO:0008320	11	6	13107	0.545455	4.78212	0.00060419	0.00060419
cytochrome-c oxidase activity	GO:0003756	13	6	13107	0.461538	4.04641	0.00183183	0.00183183
protein disulfide isomerase activity	GO:0031386	14	6	13107	0.428571	3.75738	0.00289751	0.00289751
protein tag activity	GO:0030515	15	6	13107	0.4	3.50689	0.00436614	0.00436614
protein transmembrane transporter activity	GO:0003688	13	6	13107	0.461538	4.04641	0.00183183	0.00183183
snoRNA binding	GO:0018833	16	6	13107	0.375	3.28771	0.00631785	0.00631785
NADH dehydrogenase activity	GO:0004085	10	5	13107	0.5	4.38361	0.00294392	0.00294392
RNA polymerase II activity	GO:0001055	9	5	13107	0.555556	4.87068	0.00162451	0.00162451
butyryl-CoA dehydrogenase activity	GO:0004550	5	5	13107	1	8.76722	1.91917e-05	1.91917e-05
monosaccharide binding	GO:0003954	18	5	13107	0.277778	2.43534	0.0460755	0.0460755
nucleoside diphosphate kinase activity	GO:0070181	9	5	13107	0.555556	4.87068	0.00162451	0.00162451
small ribosomal subunit rRNA binding	GO:0048029	11	5	13107	0.454545	3.9851	0.00489206	0.00489206
2-methylbutanoyl-CoA dehydrogenase activity	GO:0003853	6	4	13107	0.666667	5.84482	0.00208988	0.00208988
U2 snRNA binding	GO:0034511	11	4	13107	0.363636	3.18808	0.0287392	0.0287392
U3 snoRNA binding	GO:0070034	7	4	13107	0.571429	5.00984	0.00443497	0.00443497
endopeptidase activator activity	GO:0070180	11	4	13107	0.363636	3.18808	0.0287392	0.0287392
large ribosomal subunit rRNA binding	GO:0016628	8	4	13107	0.5	4.38361	0.00807062	0.00807062
oxidoreductase activity, acting on the CH-CH group of donors, NAD or NADP as acceptor	GO:0030620	10	4	13107	0.4	3.50689	0.0200721	0.0200721
telomerase RNA binding	GO:0061133	7	4	13107	0.571429	5.00984	0.00443497	0.00443497
ubiquinol-cytochrome-c reductase activity	GO:0008121	12	4	13107	0.333333	2.92241	0.039297	0.039297
3'-5' DNA/RNA helicase activity	GO:0004775	4	3	13107	0.75	6.57542	0.005418	0.005418
7S RNA binding	GO:0015036	6	3	13107	0.5	4.38361	0.0226912	0.0226912
ISG15 transferase activity	GO:0047134	5	3	13107	0.6	5.26033	0.0123929	0.0123929
acid phosphatase activity	GO:0003993	4	3	13107	0.75	6.57542	0.005418	0.005418
adenylate kinase activity	GO:0004045	6	3	13107	0.5	4.38361	0.0226912	0.0226912
adenylylsulfatase activity	GO:0004739	6	3	13107	0.5	4.38361	0.0226912	0.0226912
aminoacyl-tRNA hydrolase activity	GO:0033679	4	3	13107	0.75	6.57542	0.005418	0.005418
angiostatin binding	GO:0005542	6	3	13107	0.5	4.38361	0.0226912	0.0226912
box H/ACA snoRNA binding	GO:0034513	5	3	13107	0.6	5.26033	0.0123929	0.0123929
channel activity	GO:0042296	6	3	13107	0.5	4.38361	0.0226912	0.0226912
disulfide oxidoreductase activity	GO:1990518	3	3	13107	1	8.76722	0.00148129	0.00148129
folic acid binding	GO:0004017	5	3	13107	0.6	5.26033	0.0123929	0.0123929
four-way junction helicase activity	GO:0008312	7	3	13107	0.428571	3.75738	0.0363761	0.0363761
kininogen binding	GO:0015267	7	3	13107	0.428571	3.75738	0.0363761	0.0363761
protein-disulfide reductase (NAD(P)H) activity	GO:0034604	3	3	13107	1	8.76722	0.00148129	0.00148129
pyruvate dehydrogenase (NAD+) activity	GO:0043532	6	3	13107	0.5	4.38361	0.0226912	0.0226912
pyruvate dehydrogenase (acetyl-transferring) activity	GO:0047627	4	3	13107	0.75	6.57542	0.005418	0.005418
quinone binding	GO:0048038	6	3	13107	0.5	4.38361	0.0226912	0.0226912
single-stranded 3'-5' DNA helicase activity	GO:0009378	5	3	13107	0.6	5.26033	0.0123929	0.0123929
succinate-CoA ligase (ADP-forming) activity	GO:0030984	3	3	13107	1	8.76722	0.00148129	0.00148129
2,3-bisphosphoglycerate-dependent phosphoglycerate mutase activity	GO:0000036	2	2	13107	1	8.76722	0.0130022	0.0130022
3-hydroxypropionyl-CoA dehydratase activity	GO:0003998	2	2	13107	1	8.76722	0.0130022	0.0130022
CCR5 chemokine receptor binding	GO:0004146	2	2	13107	1	8.76722	0.0130022	0.0130022
H4K20me3 modified histone binding	GO:0004477	2	2	13107	1	8.76722	0.0130022	0.0130022
MutLalpha complex binding	GO:0004485	3	2	13107	0.666667	5.84482	0.0360389	0.0360389
N-acetylglucosaminyldiphosphodolichol N-acetylglucosaminyltransferase activity	GO:0004487	2	2	13107	1	8.76722	0.0130022	0.0130022
NAD+-protein-arginine ADP-ribosyltransferase activity	GO:0004488	3	2	13107	0.666667	5.84482	0.0360389	0.0360389
acyl carrier activity	GO:0004577	2	2	13107	1	8.76722	0.0130022	0.0130022
acylphosphatase activity	GO:0004735	2	2	13107	1	8.76722	0.0130022	0.0130022
adenosine 5'-monophosphoramidase activity	GO:0004748	3	2	13107	0.666667	5.84482	0.0360389	0.0360389
arginine-tRNA ligase activity	GO:0004776	2	2	13107	1	8.76722	0.0130022	0.0130022
benzodiazepine receptor binding	GO:0004814	2	2	13107	1	8.76722	0.0130022	0.0130022
channel regulator activity	GO:0005527	3	2	13107	0.666667	5.84482	0.0360389	0.0360389
copper-dependent protein binding	GO:0008308	3	2	13107	0.666667	5.84482	0.0360389	0.0360389
deNEDDylase activity	GO:0016929	3	2	13107	0.666667	5.84482	0.0360389	0.0360389
deSUMOylase activity	GO:0030156	2	2	13107	1	8.76722	0.0130022	0.0130022
dihydrofolate reductase activity	GO:0031730	2	2	13107	1	8.76722	0.0130022	0.0130022
epoxide hydrolase activity	GO:0035605	3	2	13107	0.666667	5.84482	0.0360389	0.0360389
galactose binding	GO:0043956	3	2	13107	0.666667	5.84482	0.0360389	0.0360389
glutathione disulfide oxidoreductase activity	GO:0046538	3	2	13107	0.666667	5.84482	0.0360389	0.0360389
histone H3T3 kinase activity	GO:0046848	3	2	13107	0.666667	5.84482	0.0360389	0.0360389
hydroxyapatite binding	GO:0050543	2	2	13107	1	8.76722	0.0130022	0.0130022
hypoxanthine dehydrogenase activity	GO:0052735	3	2	13107	0.666667	5.84482	0.0360389	0.0360389
hypoxanthine oxidase activity	GO:0052905	2	2	13107	1	8.76722	0.0130022	0.0130022
icosatetraenoic acid binding	GO:0052906	2	2	13107	1	8.76722	0.0130022	0.0130022
lithium ion binding	GO:0070675	3	2	13107	0.666667	5.84482	0.0360389	0.0360389
macrolide binding	GO:0102158	2	2	13107	1	8.76722	0.0130022	0.0130022
methenyltetrahydrofolate cyclohydrolase activity	GO:0140978	2	2	13107	1	8.76722	0.0130022	0.0130022
methylcrotonoyl-CoA carboxylase activity	GO:0141106	2	2	13107	1	8.76722	0.0130022	0.0130022
methylenetetrahydrofolate dehydrogenase (NAD+) activity	GO:1990889	2	2	13107	1	8.76722	0.0130022	0.0130022
methylenetetrahydrofolate dehydrogenase (NADP+) activity	GO:0004301	2	2	13107	1	8.76722	0.0130022	0.0130022
mitochondrial large ribosomal subunit binding	GO:0004758	2	2	13107	1	8.76722	0.0130022	0.0130022
peptide-methionine (R)-S-oxide reductase activity	GO:0004826	3	2	13107	0.666667	5.84482	0.0360389	0.0360389
peptidyl-cysteine S-nitrosylase activity	GO:0004854	2	2	13107	1	8.76722	0.0130022	0.0130022
phenylalanine-tRNA ligase activity	GO:0004855	3	2	13107	0.666667	5.84482	0.0360389	0.0360389
phosphatase inhibitor activity	GO:0005534	3	2	13107	0.666667	5.84482	0.0360389	0.0360389
pyrroline-5-carboxylate reductase activity	GO:0015038	2	2	13107	1	8.76722	0.0130022	0.0130022
ribonucleoside-diphosphate reductase activity, thioredoxin disulfide as acceptor	GO:0016149	2	2	13107	1	8.76722	0.0130022	0.0130022
selenocysteine insertion sequence binding	GO:0016247	3	2	13107	0.666667	5.84482	0.0360389	0.0360389
serine C-palmitoyltransferase activity	GO:0016423	3	2	13107	0.666667	5.84482	0.0360389	0.0360389
succinate-CoA ligase (GDP-forming) activity	GO:0016790	2	2	13107	1	8.76722	0.0130022	0.0130022
sulfatide binding	GO:0019212	3	2	13107	0.666667	5.84482	0.0360389	0.0360389
tRNA (cytidine-3-)-methyltransferase activity	GO:0019784	2	2	13107	1	8.76722	0.0130022	0.0130022
tRNA (guanine(37)-N1)-methyltransferase activity	GO:0031403	2	2	13107	1	8.76722	0.0130022	0.0130022
tRNA (guanine) methyltransferase activity	GO:0032405	3	2	13107	0.666667	5.84482	0.0360389	0.0360389
tRNA (guanosine(9)-N1)-methyltransferase activity	GO:0032767	2	2	13107	1	8.76722	0.0130022	0.0130022
tRNA methyltransferase activator activity	GO:0033743	2	2	13107	1	8.76722	0.0130022	0.0130022
testosterone dehydrogenase (NAD+) activity	GO:0035368	3	2	13107	0.666667	5.84482	0.0360389	0.0360389
thiolester hydrolase activity	GO:0043530	3	2	13107	0.666667	5.84482	0.0360389	0.0360389
translation release factor activity, codon specific	GO:0047035	3	2	13107	0.666667	5.84482	0.0360389	0.0360389
very-long-chain (3R)-3-hydroxyacyl-CoA dehydratase activity	GO:0070674	2	2	13107	1	8.76722	0.0130022	0.0130022
voltage-gated monoatomic anion channel activity	GO:0072354	2	2	13107	1	8.76722	0.0130022	0.0130022
xanthine dehydrogenase activity	GO:0106274	3	2	13107	0.666667	5.84482	0.0360389	0.0360389
xanthine oxidase activity	GO:0120146	3	2	13107	0.666667	5.84482	0.0360389	0.0360389
